1       **Transcription factor network analysis identifies REST/NRSF as an intrinsic**  
2                                   **regulator of CNS regeneration**

3  
4 Yuyan Cheng<sup>1,a</sup>, Yuqin Yin<sup>2,3,a</sup>, Alice Zhang<sup>1</sup>, Alexander M. Bernstein<sup>4</sup>, Riki Kawaguchi<sup>5</sup>,  
5 Kun Gao<sup>1</sup>, Kyra Potter<sup>1</sup>, Hui-Ya Gilbert<sup>2,3</sup>, Yan Ao<sup>4</sup>, Jing Ou<sup>1</sup>, Catherine J. Fricano-  
6 Kugler<sup>1</sup>, Jeffrey L. Goldberg<sup>6</sup>, Clifford J. Woolf<sup>3,10</sup>, Michael V. Sofroniew<sup>4,b</sup>, Larry I.  
7 Benowitz<sup>2,3,7,b,\*</sup>, Daniel H. Geschwind<sup>1, 8,9,b,\*</sup>

8  
9 <sup>1</sup>Department of Neurology, David Geffen School of Medicine, University of California,  
10 Los Angeles, Los Angeles, CA, USA, UCLA, Los Angeles, CA 90095

11 <sup>2</sup>Department of Neurosurgery, Harvard Medical School, Boston MA 02115

12 <sup>3</sup>F.M. Kirby Neurobiology Center, Boston Children's Hospital, Boston MA 02115

13 <sup>4</sup>Department of Neurobiology, David Geffen School of Medicine, University of California,  
14 Los Angeles, Los Angeles, CA 90095

15 <sup>5</sup>Departments of Psychiatry and Neurology, University of California, Los Angeles, Los  
16 Angeles, CA 90095

17 <sup>6</sup>Byers Eye Institute and Wu Tsai Neuroscience Institute, Stanford Univ., Palo Alto CA

18 <sup>7</sup>Department of Ophthalmology, Harvard Medical School, Boston MA 02115

19 <sup>8</sup>Department of Human Genetics, David Geffen School of Medicine, University of  
20 California, Los Angeles, Los Angeles, CA 90095

21 <sup>9</sup>Institute of Precision Health, University of California, Los Angeles, Los Angeles, CA  
22 90095

23 <sup>10</sup>Department of Neurobiology, Harvard Medical School, Boston MA 02115

24 <sup>a</sup>Co-first authors, <sup>b</sup>Co-senior authors, \*Correspondence: Daniel Geschwind:  
25 dhg@mednet.ucla.edu or Larry Benowitz: larry.benowitz@childrens.harvard.edu

26  
27 Lead Contact: Daniel Geschwind: dhg@mednet.ucla.edu

## 28 **SUMMARY**

29 The inability of neurons to regenerate long axons within the CNS is a major impediment  
30 to improving outcome after spinal cord injury, stroke, and other CNS insults. Recent  
31 advances have uncovered an intrinsic program that involves coordinate regulation by  
32 multiple transcription factors that can be manipulated to enhance growth in the peripheral  
33 nervous system. Here, we used a system-genomics approach to characterize regulatory  
34 relationships of regeneration-associated transcription factors, identifying RE1-Silencing  
35 Transcription Factor (REST; Neuron-Restrictive Silencer Factor, NRSF) as a predicted  
36 upstream suppressor of a pro-regenerative gene program associated with axon  
37 regeneration in the CNS. We validate our predictions using multiple paradigms, showing  
38 that mature mice bearing cell type-specific deletions of REST or expressing dominant-  
39 negative mutant REST showed improved regeneration of the corticospinal tract and optic  
40 nerve, accompanied by upregulation of regeneration-associated genes in cortical motor  
41 neurons and retinal ganglion cells, respectively. These analyses identify a novel role for  
42 REST as an upstream suppressor of the intrinsic regenerative program in the CNS and  
43 demonstrate the power of a systems biology approach involving integrative genomics and  
44 bio-informatics to predict key regulators of CNS repair.

## 45 INTRODUCTION

46 Injured axons in the adult mammalian central nervous system (CNS) generally cannot  
47 regenerate over long distances, limiting functional recovery from CNS injury (1). Potential  
48 mechanisms underlying regenerative failure in the mature CNS include a lack of an  
49 intrinsic ability to activate genes and pathways required for axon regrowth after injury (2,  
50 3); the presence of extrinsic growth-repulsive factors associated with certain extracellular  
51 matrix molecules, myelin debris, or fibrotic tissue (4-6); and limited availability of  
52 appropriate growth factors (1, 7, 8). Strategies to neutralize or attenuate key cell-extrinsic  
53 inhibitors of axon growth have limited effects on regeneration (9, 10), though their impact  
54 is strongly enhanced by co-activating neurons' intrinsic growth state (11-13). Deleting  
55 PTEN, a cell-intrinsic suppressor of axon growth, induces appreciable axon regeneration,  
56 and when combined with either CNTF plus SOCS3 deletion, or with inflammation-  
57 associated factors plus cAMP, enables a percentage of retinal ganglion cells to regrow  
58 axons the full length of the optic nerve (14-17). Nonetheless, more work is needed to  
59 identify key regulators of axon regeneration in the CNS, including transcription factors  
60 that act as master switches of the regenerative program.

61 Unlike their CNS counterparts, peripheral sensory and motor neurons  
62 spontaneously display potent growth in response to peripheral axonal injury, which is  
63 accompanied by activation of key regeneration-associated genes (RAGs) (18, 19) that  
64 we recently found to act as a coordinated network to promote growth (20). Expression of  
65 this RAG network is predicted to be regulated by a core group of TFs during peripheral  
66 nerve regeneration (20). This prediction is supported by the findings that manipulating  
67 individual TFs at the core of this network, such as STAT3 (21), KLF family members (22,  
68 23), and Sox11 (24, 25) result in varying amounts of CNS axon growth. The effects of  
69 TFs on their target pathways are dynamic, combinatorial, and form tiered regulatory  
70 networks, requiring tight control in timing, dosage, and the context of each TF involved  
71 (26-30). The complexity of recapitulating coordinated TF regulatory events may limit the  
72 effectiveness of single gain- or loss-of-function experiments to determine contributions of  
73 individual TFs within a complex network (31). Alternatively, illuminating the hierarchical  
74 transcriptional network architecture from gene expression datasets provides an efficient  
75 means to identify key upstream regulators of various biological processes, for example

76 pluripotency (32). Predominant models of TF networks rely on a 3-level pyramid-like  
77 structure, with a small number of TFs at the top-level that function as ‘master’ regulators,  
78 driving expression of most of the other mid- and bottom level TFs that directly or indirectly  
79 regulate the expression of their target genes (30, 33-35).

80 Here, we integrated multiple existing and newly-generated datasets to  
81 characterize hierarchical TF interactions so as to identify potential upstream regulators  
82 associated with the intrinsic axon regeneration state (Figure 1A). By comparing gene  
83 expression in non-permissive states, such as the injured CNS, to the permissive PNS or  
84 to the CNS that has been subjected to strong pro-regenerative treatments, we  
85 hypothesized that we could identify key upstream TFs driving intrinsic regeneration  
86 programs. We began with a mutual information-based network analysis approach to  
87 characterize the transcriptional regulatory network formed by regeneration-associated  
88 TFs (20) in multiple independent data sets. We identified a core three-level subnetwork  
89 of five interconnected TFs, consisting of Jun, STAT3, Sox11, SMAD1, and ATF3, which  
90 is strikingly preserved across multiple PNS injury models and at different timescales (36-  
91 39). Remarkably, we observe a similar multi-layer, highly inter-connected TF structure in  
92 CNS neurons following genetic and pharmacological treatments that enhance  
93 regeneration. In contrast, in the non-regenerating CNS at baseline (36, 40, 41), this  
94 regeneration-associated subnetwork and its 3-tier hierarchical structure are dismantled,  
95 and candidate TFs adopt a less interconnected and less hierarchical structure.

96 Our analyses identified RE1-silencing transcription factor (REST; (42, 43)), a  
97 widely studied regulator of neural development and neural-specific gene expression (42-  
98 45) (46, 47), as playing a potentially important role in suppressing CNS regeneration  
99 (Figure 1). The bio-informatic analyses showed that REST, a repressive factor, is present  
100 at the apex of a degenerate TF network in the non-regenerating CNS, but absent in the  
101 PNS and in CNS neurons with enhanced regenerative potential, both in the optic nerve  
102 and spinal cord. Our findings suggested that REST acts as a potential upstream  
103 transcriptional repressor, limiting the interactions of the core regenerative TFs to drive the  
104 expression of RAGs and the intrinsic growth capacity of CNS neurons (Figure 1B). This  
105 hypothesis was supported by transcriptomic analysis of REST-depleted, CNS-injured  
106 neurons, which displayed enhanced expression of a regeneration-associated gene

107 network, driven by several core TFs known to promote regeneration. To further validate  
108 our bio-informatic predictions, we investigated the effects of counteracting REST on  
109 regeneration in two different models of CNS injury *in vivo* – optic nerve crush and  
110 complete spinal cord injury (SCI) – via conditional depletion or functional inactivation of  
111 REST in retinal ganglion cells (RGCs) and corticospinal tract (CST) projection neurons  
112 (Figure 1C). In both cases, counteracting REST resulted in increased regeneration.  
113 These findings demonstrate how a multi-step systems biological analysis coupled with  
114 substantial *in vitro* and *in vivo* experimental validation provides a framework for discovery  
115 of drivers of CNS repair, and implicate REST as a novel regulator of CNS axon  
116 regeneration.

## 117 **RESULTS**

### 118 **Bio-informatic analysis identifies REST as a potential upstream repressor of a** 119 **regeneration-associated network**

120 To determine which of the previously identified pro-regenerative TFs (20) are essential  
121 drivers of the neural intrinsic growth program, we characterized the regulatory network  
122 among these TFs to define their directional and hierarchical relationships. We employed  
123 a step-wise approach, summarized in Figure 2A. To infer directionality of each pair of TFs,  
124 we applied the Algorithm for Reconstruction of Accurate Cellular Networks (ARACNe), a  
125 mutual-information (MI) based algorithm for reverse-engineering transcriptional  
126 regulatory network from gene expression datasets (48, 49). ARACNe connects two genes  
127 only if there is an irreducible statistical dependency in their expression. These  
128 connections likely represent direct regulatory interactions mediated by a TF binding to its  
129 target genes, which could be TFs, and thus can be used to predict the TF network and  
130 their transcriptional targets (48) (Figure 2A; Methods). These predictions have been  
131 extensively validated by experimental analysis, such as chromatin immunoprecipitation  
132 sequencing (ChIP-Seq), a method to identify physical TF-target binding, or by examining  
133 expression changes of target genes led by gain- or loss- of function of the regulatory TFs  
134 (50-54).

135 In an ARACNe-constructed transcriptional regulatory network, a TF is either  
136 predicted to have a positive edge with its target genes (i.e. activator of expression; MI (+))  
137 when their expression patterns are positively correlated, or negative edge (i.e. repressor  
138 of expression, MI (-)) if the TF displays opposite transcriptional changes from its targets  
139 (Figure 2A, step 1). We subsequently validated the initial bio-informatic predictions of  
140 edge directionality by compiling direct biochemical evidence of physical TF-target binding  
141 observed by multiple ChIP-Seq or ChIP-ChIP databases (55, 56), leading to a high-  
142 confidence, directed TF regulatory network supported by experimental evidence (Figure  
143 2A, step 2). Lastly, the hierarchical structure of the directed TF network was defined by a  
144 graph-theoretical algorithm (33), which constructs the precise topological ordering of  
145 members in any directed network (35) (Figure 2A, step 3).

146 Because TF binding is a dynamic process that may change over time, we analyzed  
147 9 high-density time-series gene expression profiles upon injury to build the networks,

148 leveraging the chronological order of regulatory events. By applying our step-wise  
149 pipeline to 6 peripheral nerve and 3 spinal cord injury datasets (Figure 2B; Methods), we  
150 sought to identify reproducible differences in transcriptional regulatory networks between  
151 regenerating PNS and non-regenerating CNS neurons following injury. We found that the  
152 candidate TFs regulate each other within complex, multi-layered networks, similar to TF  
153 network models defined by ENCODE (Figure 2C; (30, 34)). Across multiple datasets in  
154 multiple PNS injury models collected in different laboratories at different timescales, we  
155 observed a remarkable preservation of a defined five TF subnetwork, consisting of JUN,  
156 STAT3, SOX11, SMAD1, and ATF3 (Figure 2C), all of which are required for peripheral  
157 nerve regeneration (20, 57-66). In striking contrast, this subnetwork is dismantled and  
158 adopts a simpler, bi-layered, less inter-connected, and less hierarchical structure in the  
159 case of CNS injury (Figure 2D).

160 The expression levels of all 5 core TFs (*Atf3*, *Jun*, *Sox11*, *Stat3*, *Smad1*) were  
161 consistently increased among multiple PNS injury datasets (Figure S1A). Their increases  
162 occur as early as 0.5-3 hours after PNS injury (Figure S1A, PNS1, 3, and 5), and are  
163 maintained for as long as ~40 days (Figure S1A, PNS2, and 4). In contrast, in the CNS,  
164 these key TFs were either not induced by CNS injury (Figure S1A, CNS1 and 2), or were  
165 transiently up-regulated but quickly repressed at later stage (Figure S1A, CNS3). In  
166 addition, *Atf3*, *Jun*, *Sox11*, and *Smad1* bear the most correlated regulatory relationships  
167 with others across multiple PNS injury datasets (Figure S1B PNS vs PNS). By contrast,  
168 there is little correlation in the regulatory interactions of the core TFs between PNS and  
169 CNS injury datasets (Figure S1B, CNS vs PNS). This finding is in general agreement  
170 with previous work (20), in which the peripherally activated RAG program predicted to be  
171 targeted by these TFs is highly preserved in PNS injury datasets, but not in the CNS. Our  
172 results indicate that a highly reproducible TF network potentially driving the expression of  
173 a RAG program is induced during peripheral nerve regeneration, but is significantly  
174 attenuated in the injured CNS.

175 Remarkably, we observed that two TFs, REST and CTCF, exhibit significant  
176 interactions with top-tier TFs in the CNS network, but not in the PNS network, and are  
177 predicted to inhibit other top-tier TFs. *Rest* mRNA levels did not change after PNS injury  
178 (Figure S1A, PNS1-5), but were increased by CNS injury when other key regenerative



179 TFs began to be repressed (Figure S1A, CNS1-3). We did not observe changes of *Ctcf*  
180 expression levels following PNS or CNS injury. We therefore hypothesized that REST,  
181 which appears at the apex of a dismantled, less inter-connected TF network, was a  
182 potential upstream transcriptional repressor of the core TF network specifically in the non-  
183 regenerating CNS, thus limiting interactions between the core TFs to drive the expression  
184 of regeneration-associated genes and to activate the intrinsic growth state of CNS  
185 neurons.

186

### 187 **REST deletion in CNS-injured neurons increases expression of growth-related** 188 **genes and pathways**

189 We hypothesize that if REST were indeed an upstream repressor, as predicted by  
190 our bio-informatic model, its depletion in CNS neurons should release the transcriptional  
191 brake of pro-regenerative TFs and genes, subsequently increasing their expression. To  
192 test this hypothesis, we performed RNA-seq on REST-depleted sensorimotor cortical  
193 neurons that give rise to the corticospinal tract (CST) axons that course through the spinal  
194 cord. The CST is essential to control voluntary motor movements, and the failure of CST  
195 axons to regenerate is a major impediment to improving outcome after spinal cord injuries  
196 (67). To induce neuron-specific REST depletion, we injected adeno-associated virus  
197 expressing Cre recombinase or GFP as a control under a synapsin promoter (AAV-Syn-  
198 Cre and AAV-Syn-GFP) in the sensorimotor cortex of mice with homozygous conditional  
199 REST alleles and a TdTomato reporter (REST<sup>flx/flx</sup>; STOP<sup>flx/flx</sup> TdTomato mice; Methods).  
200 REST knock-out (cKO) was confirmed by tdTomato expression in the cortical area of  
201 REST<sup>flx/flx</sup>; STOP<sup>flx/flx</sup> TdTomato mice injected with AAV-Syn-Cre. No TdTomato was  
202 observed in control mice receiving AAV-Syn-GFP. We then performed anatomically  
203 complete spinal cord crush at thoracic level 10 (T10) to avoid the spontaneous axon  
204 regeneration due to circuit reorganization that can occur after incomplete injury (68).  
205 Following sham or T10 SCI, neurons expressing GFP- (wild-type) or tdTomato- (REST  
206 cKO) were FACS-sorted at multiple time points post injury for RNA sequencing (Figure  
207 3A; Methods). We then analyzed transcriptional differences in response to SCI and REST  
208 depletion at both the individual gene expression level and co-expression network level.  
209 Integrating network-level analysis complements analysis of differential expression by



210 reducing the dimensionality of a large transcriptomic dataset and helps to find clusters of  
211 genes sharing expression patterns and biological functions (69).

212 We first examined differentially expressed genes in response to injury alone  
213 (Figure S2A-B). In wild-type neurons expressing AAV-GFP, SCI up-regulated genes  
214 involved in both injury- and regeneration-associated processes at day 1, including  
215 apoptosis, neuron projection, cell adhesion, and axon extension (Figure S2C) (40, 41). At  
216 days 3 and 7 post-injury, however, the up-regulated genes were predominantly  
217 associated with injury-relevant pathways involved in oxidative stress, and receptors or  
218 channels that increase neural excitability (Figure S2C) (40, 41). REST expression levels  
219 were increased in sensorimotor cortex neurons at 3 and 7 days post-injury (Figure 3B,  
220 AAV-Syn-GFP) in parallel with the expression of injury-relevant gene expression patterns.

221 The timing of REST expression subsequent to the early, but aborted regeneration  
222 pathways, and prior to more subacute injury-related pathways, was consistent with REST  
223 potentially repressing regeneration-associated genes and pathways. To test this  
224 hypothesis, we compared gene expression responses in sorted, purified, sensorimotor  
225 cortex neurons with or without REST deletion at multiple time points post SCI. At early  
226 time points following injury, only a few genes were responsive to REST deletion, whereas  
227 far more DEGs were identified at 7 days following injury (Figure 3C), consistent with the  
228 observed time-dependent increase of REST following SCI. A gene ontology analysis  
229 showed that up-regulated genes resulting from REST deletion are involved in regulation  
230 of neural transmission, neuron projection, and neurite growth or patterning, while the  
231 down-regulated genes are associated with protein translation, mRNA processing, and cell  
232 cycle (Figure S3A). Remarkably, expression levels of the core five peripheral axon  
233 regeneration-associated TF network genes (*Jun*, *Smad1*, *Sox11*, *Stat3*, and *Atf3*) (Figure  
234 2) were all up-regulated in REST-depleted neurons (Figure 3B), with *Jun* and *Atf3*  
235 significantly increased at day 3 post SCI, and *Smad1*, *Sox11*, *Stat3* significantly increased  
236 by day 7. Notably, other TFs or known genes in the RAG program that we previously  
237 characterized in the PNS (20) were also increased by REST depletion (Figure S3B),  
238 including immediate early genes induced by peripheral injury (*Egr1*) (70), growth-  
239 associated proteins (*Gap43*, *Cap23*) (71) (72), molecules involved in vesicle and

240 cytoskeletal transport (*Vav2*, *Syt4*) (73) (74), cell proliferation (*Pcna*) (75), cAMP signaling  
241 (*Rapgef4/Epac2*) (76) and p38 MAPK signaling (*Atf2*, *MApkapk2*) (77).

242 REST binds to more than 1300 RE1 sites in the genomes of humans and other  
243 mammals (78), and the binding of REST to its targets is often context-specific (79). To  
244 next investigate whether the DEGs are likely to be directly or indirectly regulated by REST  
245 in the context of SCI, we compared genes identified in our RNA-seq dataset to genes with  
246 experimentally-proven REST-binding genes (80), and to a previously published REST  
247 ChIP-seq dataset from adult neural progenitor cells (81). We found a significant overlap  
248 between canonical REST targets and genes up-regulated by REST deletion at day 7 post  
249 SCI, though not at other times (Figure 3D;  $OR_{(TRANSFAC)} = 3.54$ ,  $OR_{(NPC)} = 2.18$ ;  $p_{(TRANSFAC)} = 9e-03$ ,  $p_{(NPC)} = 2e-05$ , Fisher's exact test). GO analysis indicates that these  
250 overlapping genes are implicated in neural transmission and neuron projection,  
251 processes up-regulated by REST depletion (Figure S3A). Overall, these findings indicate  
252 that REST is up-regulated by CNS injury (Figure 3B) and that it transcriptionally represses  
253 its canonical neuronal target genes, as well as the regeneration-associated TFs, as was  
254 predicted by our bio-informatic analysis (Figure 2 and Figure S1). Although the over-  
255 representation of REST binding sites with the promoters of RAGs suggested that these  
256 effects were mainly direct, it is also possible that REST inhibition improves regeneration  
257 by abrogating the transcription of other TFs that are known to limit CNS regeneration,  
258 such as *Pten*, *Socs3*, and *Klf4*. We did not observe a significant change in expression of  
259 these well-defined repressors of regeneration, however (Figure S3C). These findings, and  
260 the over-representation of REST binding sites within RAGs, suggest that REST is likely  
261 acting independently of these known repressive molecules to regulate axon regeneration.

262

### 263 **REST deletion enhances a co-expression network associated with regeneration**

264 Next, we used Weighted Gene Co-expression Network Analysis (WGCNA) (69, 82,  
265 83) to identify network-level changes regulated by REST. Compared with ARACNe, which  
266 estimates statistical direct interactions based on mutual information (48) and is especially  
267 suited for TF-network analysis (Figure 2), WGCNA identifies modules of highly co-  
268 expressed genes, with direct or indirect interactions and shared biological functions and  
269 pathways (83). In addition, we previously showed that WGCNA modules could be further  
270

271 integrated with experimentally validated protein-protein interactions (PPI) to identify  
272 protein-level signaling pathways represented by gene networks (20). This would not only  
273 provide independent validation of the relationship inferred by RNA co-expression, but also  
274 important PPI pathways as potential therapeutic intervention.

275 We performed WGCNA on the RNA-seq data generated from sensorimotor cortex  
276 neurons expressing AAV-Syn-GFP (wild-type) or AAV-Syn-Cre (REST-depleted)  
277 collected at 1, 3, and 5 days following SCI (Methods; Figure S4 A-C). Based on the  
278 correlation of the first principle component of a module, called the module eigengene,  
279 with time-dependent changes after injury, we found five modules significantly altered by  
280 REST deletion: RESTUP1, RESTUP2, and RESTUP3, which were up-regulated by REST  
281 deletion, and RESTDOWN1 and RESTDOWN2, which were down-regulated (Figure 4A  
282 lower panel, Figure 4B, Figure S4D). To determine which of these gene modules altered  
283 by REST deletion are associated with regeneration, we performed an enrichment analysis  
284 between each module and the core RAG co-expression module, which we previously  
285 identified to be activated during peripheral nerve regeneration and enriched for  
286 regeneration-associated pathways in multiple independent data sets (20). This analysis  
287 found that the up-regulated module RESTUP1 and RESTUP3 significantly overlapped  
288 with a core RAG co-expression module (Figure 4A upper panel).

289 Among the pathways associated with this core RAG module, the RESTUP3  
290 module was enriched with cAMP-mediated, Ephrin-, PKA-, TGF $\beta$ -, GPCR- and MAPK  
291 signaling, while the RESTUP1 module was modestly enriched with integrin-, chemokine-,  
292 and HMGB1 signaling pathways (Figure 4C). To extend this analysis to the protein level,  
293 we evaluated the overlap between PPIs from co-expressed genes in RESTUP1 or  
294 RESTUP3 and the regeneration-associated PPIs from the RAG module. We found that  
295 PPIs from RESTUP3 and RESTUP1 were enriched for very similar regeneration-  
296 associated pathways shown by gene-level overlap analysis (Figure 4C), which are linked  
297 by members of the core TF regulatory network activated in the regenerating PNS (Figure  
298 4D, Supplemental Table 2), including Jun, SMAD1, STAT3 and ATF3 (Figure 2B, Figure  
299 S1A). These core regenerative TFs also appear as module hubs in the PPI network of  
300 the RESTUP3 module (Figure 4E). Further GO analysis of general biological pathways  
301 represented by these modules showed that the RESTUP3 module is associated with

302 neuronal projection, metabolism, or synaptic transmission (Figure 4F). These analyses  
303 support a model whereby inhibition of REST activates a core molecular program driven  
304 by a tightly controlled TF network similar to the one activated during peripheral nerve  
305 regeneration, along with other complementary pathways, to enable subsequent  
306 regenerative processes (Figure 4G).

307

### 308 **REST is a transcriptional repressor negatively correlated with the regeneration** 309 **state of retinal ganglion cells**

310 To assess the potential generalizability of the bio-informatic predictions derived  
311 from spinal cord and peripheral nerve injury above, we extended the same TF regulatory  
312 network analysis to another CNS neuronal population, injured retinal ganglion cells  
313 (RGCs). RGCs extend axons through the optic nerve, conveying diverse visual features  
314 to the lateral geniculate nucleus, superior colliculus, and other relay centers in the di- and  
315 mesencephalon, and are a well-established example of CNS neurons that normally  
316 exhibit little or no regeneration (1); mature RGCs fail to regenerate their axons beyond  
317 the site of optic nerve injury and soon begin to die (84). However, varying degrees of  
318 regeneration can be induced by treatments that include growth factors associated with  
319 intraocular inflammation (85-88), CNTF gene therapy (89), deletion of cell-intrinsic  
320 suppressors of axon growth, of which PTEN deletion is the single most effective (14, 17,  
321 22, 25, 90, 91), zinc chelation (92), physiological activity (92, 93), chemical activation of  
322 the regenerative gene program (20) and, most effectively, by combining two or more of  
323 these treatments (17, 20, 94, 95).

324 From our initial bio-informatic predictions comparing PNS and CNS injured tissues,  
325 we hypothesized that the disrupted TF network in the injured, non-growing RGCs, similar  
326 to the CNS-injured spinal cord tissues (Figure 2D), would re-gain substantial connectivity  
327 in RGCs treated so as to be in a more regenerative state. Using mice that express cyan-  
328 fluorescent protein (CFP) in RGCs (96), we induced robust axon regeneration by  
329 combining a strong genetic pro-regenerative manipulation, RGC-selective PTEN knock-  
330 down (AAV2-shPten.mCherry; Methods; (14, 97)), with intraocular injection of the  
331 neutrophil-derived growth factor oncomodulin (Ocm: (86, 87) and the non-hydrolyzable,  
332 membrane-permeable cAMP analog CPT-cAMP (a co-factor of Ocm) immediately after

333 nerve injury. This combination provides one of the strongest regenerative responses  
334 described to date (Figure 5A), while avoiding complications that might be introduced by  
335 inducing intraocular inflammation (15, 16, 87). Controls received an intraocular injection  
336 of AAV2 expressing shLuciferase.mCherry 2 weeks before surgery and saline  
337 immediately afterwards. These mice did not exhibit axon regeneration (Figure 5A-B; see  
338 Methods). We dissected retinas and FACS-sorted RGCs from non-regenerating, control  
339 treatment, or from RGCs exposed to the pro-regenerative combinatorial treatment 1, 3 or  
340 5 days after optic nerve crush injury, followed by transcriptomic analysis via RNA-seq in  
341 8-10 biological replicates for each condition (Figure 5C; Methods).

342 To quantitatively determine a TFs' association with RGCs' regeneration state, we  
343 first performed gene set enrichment analysis (GSEA) to compare a gene expression  
344 signature correlated with the RGC axon regenerative state against 'tag gene sets' with  
345 known binding sites for TFs (98). GSEA returns an enrichment score (ES) of this  
346 comparison to determine whether the gene set represented by regeneration-associated  
347 genes is enriched in targets of any TFs and if it is a positive or negative regulator of the  
348 genes associated with regeneration phenotype (Figure 5D; (99)). Among the ~1000 TF-  
349 target gene sets unbiasedly tested, REST is ranked as the top negative regulator of the  
350 RGC regeneration state-associated gene set at day 1 following injury, which is attenuated  
351 on days 3 and 5 after injury (Figure 5D), consistent with REST being an early, upstream  
352 event in the regulatory cascade.

353 We next performed a complementary analysis using the same ARACNe-based  
354 pipeline as used in our initial analysis of published PNS and CNS microarray datasets to  
355 construct a data-driven, unsupervised, hierarchical network of the regenerative TFs within  
356 this new RNA-seq dataset. Similar to CNS injured tissues in the first analysis (Figure 2D),  
357 non-regenerative RGCs with control treatment adopt a simpler, less inter-connected, and  
358 less structured TF network. This unsupervised analysis showed again that REST appears  
359 at the top-layer of the non-regenerating network (Figure 5E, Control), and is negatively  
360 correlated with other lower-layer TFs (Figure 5F, Control). By contrast, pro-regenerative  
361 treatments re-established a more complex, multi-layered network with higher connectivity  
362 (Figure 5E, global clustering coefficient in Control = 0.25, versus the pro-regenerative  
363 treatment = 0.54), in which REST is dissociated and the key regenerative TFs (ATF3, Jun,

364 Sox11, Stat3) are more connected (Figure 5F), similar to the microarray data from PNS  
365 (Figure 2). Other commonly used statistics for network connectivity such as local  
366 clustering coefficient, betweenness centrality, and in- and out-degree (Methods), further  
367 revealed significantly higher connectivity for the RAG TFs in the regenerating versus non-  
368 regenerating group (Figure S5A). These results from independent datasets and different  
369 tissues further support our original bio-informatic predictions that neurons displaying  
370 regenerative potential are associated with a highly inter-connected, structured TF-  
371 regulatory network. Further, these analyses (e.g., Figure 2 and 5) show that REST  
372 appears as an inhibitory TF at the apex of a dismantled TF network in the non-  
373 regenerating CNS neurons, but is not associated with the highly interacting TF network  
374 present in neurons in a regenerating state.

375         These multiple analyses of independent data suggested that REST is an upstream  
376 transcriptional repressor potentially limiting the interactions between lower-level TFs and  
377 the expression of regeneration-associated genes. One prediction of this model is that  
378 REST target genes should be enriched in RAGs and RAG-associated processes, parallel  
379 with GSEA (Figure 5F). We observed 630 transcriptional interactions with REST predicted  
380 by ARACNe, including 339 positively regulated (activated) genes and 321 negatively  
381 regulated (repressed) genes (Figure S5B, Supplemental Table 4; Methods). Enriched GO  
382 terms for genes predicted to be activated by REST include metabolic processes,  
383 response to endoplasmic reticulum (ER) stress, and RNA binding and transport (Figure  
384 S5C), whereas genes predicted to be repressed by REST are indeed implicated in  
385 processes or pathways associated with axon regeneration (18), including calcium ion  
386 transport, axon guidance, synaptogenesis, CREB- and cAMP-mediated signaling (Figure  
387 S5C). The REST-repressed, regeneration-associated gene set was enriched with down-  
388 regulated genes at early stages (day 1), which were up-regulated in the later stages of  
389 regeneration (day 3 and 5) (Figure 5G, GSEA), suggesting a release of the transcriptional  
390 brake by REST on these genes. Altogether, two independent analyses of data from  
391 different sources that were focused on identifying key upstream TFs regulating CNS  
392 regeneration using unsupervised methods revealed REST to be a key transcriptional  
393 upstream repressor of a RAG program, suggesting that it would be a potential novel  
394 suppressor of regeneration. Conversely, since REST is a repressor of a pro-regenerative



395 program, these analyses predict that counteracting REST would enhance regeneration  
396 after injury. To formally test this model, we next performed several experiments both *in*  
397 *vitro* and *in vivo*, using dorsal root ganglia (DRGs) cultured on a growth-suppressive  
398 substrate to model CNS-injured environment and two different *in vivo* models of CNS  
399 injury – complete spinal cord injury (SCI) and optic nerve crush.

400

#### 401 **REST deletion facilitates, and over-expression inhibits, neurite growth *in vitro***

402 We first tested the consequences of gain- and loss- of function of REST in  
403 dissociated adult dorsal root ganglion (DRG) neurons *in vitro*. We hypothesized that if  
404 REST were indeed inhibitory, its depletion should be permissive, whereas its over-  
405 expression would inhibit the normal ability of PNS neurons to extend processes. REST  
406 depletion was achieved by infecting DRG neurons obtained from REST<sup>flx/flx</sup>;  
407 STOP<sup>flx/flx</sup>TdTomato mice (Methods) with adeno-associated virus expressing Cre  
408 recombinase (AAV-Cre; Methods). Cells infected with AAV-Cre, but not control virus  
409 (AAV-GFP), showed reduced REST mRNA and protein levels with tdTomato expression  
410 turned on (Figure S6A-C).

411 To test the role of REST in a growth-suppressive environment to mimic the injured  
412 CNS, we grew DRG neurons on chondroitin sulphate proteoglycans (CSPG), a class of  
413 growth-suppressive extracellular matrix molecules present in injured CNS tissue (4, 100),  
414 and compared this with growth on laminin, a growth-permissive molecule that positively  
415 supports extension of injured peripheral axons (101). We first determined a CSPG dose  
416 that inhibits neurite growth without affecting cell survival (Figure S6D; Methods) and used  
417 this concentration to test the effects of REST depletion in DRG neurons. In agreement  
418 with previous findings (102, 103), DRG neurons treated with AAV-GFP had limited neurite  
419 extension when cultured on CSPG (Figure 6A-B). However, REST reduction induced by  
420 AAV-Cre (Figure 6C) enhanced neurite outgrowth by ~40% compared with control  
421 neurons (Figure 6A-B, CSPG group), showing that inhibition of REST enables neurite  
422 extension of regeneration-competent neurons in a growth-suppressive environment.  
423 Notably, REST deletion did not affect neurite extension of DRG neurons when cultured  
424 on laminin (Figure 6A-B, laminin group), suggesting that REST-mediated inhibition of  
425 growth processes may be activated by a growth-suppressive environment that mimics the



426 injured CNS, such as the presence of CSPG, and is not present in the presence of  
427 permissive substrates that support peripheral axonal growth.

428 We further hypothesized that REST over-expression might inhibit the ability of  
429 DRG neurons to extend processes following a PNS injury. To test this hypothesis, we  
430 over-expressed REST in cultured DRG neurons for seven days using lentiviral constructs,  
431 followed by re-plating, a process to remove existing DRG neurites *in vitro*. This model  
432 recapitulates many biochemical and morphological features of an *in vivo* pre-conditioning  
433 peripheral nerve injury (Methods) (104-106). The efficiency of REST over-expression was  
434 confirmed by qPCR (Figure S6D). We observed that increasing REST construct  
435 concentration dose-dependently inhibited neurite extension, particularly at the highest  
436 concentration (Figure 6D).

437

### 438 **REST deletion enhances corticospinal tract (CST) regeneration after spinal cord** 439 **injury.**

440 To test the predicted role of REST in CST axon regeneration *in vivo*, we injected  
441 AAV-GFP or AAV-Cre into the sensorimotor cortex of adult REST<sup>flx/flx</sup> mice (107), where  
442 CST neurons of origin are located. Following sham or T10 SCI, CST axons were traced  
443 by injecting the anterograde tracer biotinylated dextran amine (BDA) into the sensorimotor  
444 cortex (Figure 7A). At 8 weeks post injury, CST axons in mice receiving AAV-GFP  
445 exhibited characteristic dieback from the lesion center, consistent with previous reports  
446 (108, 109). Conditional deletion of REST led to ~45% more CST axons proximal to the  
447 lesion site (Figure 7B-C), suggesting either a lack of dieback in the axons of REST-  
448 deficient neurons or a regrowth of axons after injury.

449 To distinguish between these potential mechanisms, we first examined CST axons  
450 3 days post-injury. Apparent dieback and large numbers of retraction bulbs were  
451 observed at this early time point in both control and REST-deleted axons (Figure S7A).  
452 We then measured branching of CST axons at 4 weeks post injury which, when increased,  
453 is considered to be strong evidence of regenerative growth (68, 110) (Figure 7D;  
454 Methods). Mice receiving AAV-Cre displayed far more branching from injured CST axons  
455 in the area proximal to the lesion center than controls (Figure 7E-F), indicating that REST  
456 depletion promotes regenerative axon growth. In addition, REST-deficient CST axons

457 traced by BDA expressed more GAP43 (Figure 7 G-H, GAP43+ BDA+) and  
458 synaptophysin (Figure 7 I-J, Syn+ BDA+) than wild-type axons, especially in bouton-like  
459 structures in grey matter just proximal to the lesion, indicating the potential of these axons  
460 to re-grow and potentially establish pre-synaptic machinery. REST deletion in uninjured  
461 mice did not change the number of CST axons (Figure S7B), suggesting that the lack of  
462 REST does not affect axon growth in intact or homeostatic states.

463

#### 464 **REST inactivation stimulates optic nerve regeneration and RGC neuroprotection**

465 We next tested the role of REST in RGCs, another well-characterized model of  
466 CNS regeneration, by intraocular injection of an adeno-associated virus expressing a  
467 previously validated dominant-negative REST mutant (AAV2-d/n REST) that includes the  
468 DNA-binding domain but lacks the repressor domain of REST (111) vs. a control virus  
469 (AAV2-GFP: Figure S8A; Methods). After allowing one week for expression of virally  
470 encoded d/n REST, we dissected and dissociated retinas and placed the cells in culture  
471 (112) with or without recombinant oncomodulin, forskolin (to elevate cAMP), and  
472 mannose, a necessary co-factor (87). Expression of d/n REST caused a modest increase  
473 in neurite outgrowth by itself and greatly enhanced levels of neurite outgrowth induced by  
474 Ocm/cAMP/mannose (Figure 8A, B). D/N REST also increased RGC survival irrespective  
475 of the presence or absence of Ocm/cAMP/mannose (Figure 8A, C).

476 To validate these observations *in vivo*, we used two independent methods to  
477 counteract REST (Figure S8A). In the first of these approaches, we examined whether  
478 AAV2-d/n REST was sufficient to induce optic nerve regeneration and/or promote RGC  
479 survival. Two weeks after optic nerve injury, expression of d/n REST was sufficient to  
480 stimulate 43% of the level of axon regeneration (Figure 8D, E) that was achieved with the  
481 powerful combinatorial treatment (*pten* deletion, rOcm, CPT-cAMP) subsequently used  
482 to generate the transcriptome dataset (c.f. Figure 5A, B). In addition, d/n REST  
483 expression more than doubled RGC survival at two weeks post-optic nerve injury  
484 (compared to mice injected with AAV2-GFP: Figure 8F), an effect that fully recapitulated  
485 the strong neuroprotection afforded by the combination of *pten* deletion, rOcm, and CPT-  
486 cAMP (Figure 5B). In parallel to our cell culture studies (Figure 8A-C), we also examined  
487 the effect of combining d/n REST expression with Ocm plus cAMP *in vivo*. Whereas a

488 single injection of rOcm + cAMP alone induced little regeneration and no increase in RGC  
489 survival relative to untreated controls, combining rOcm + cAMP with the expression of d/n  
490 REST increased axon regeneration 55% above the level achieved with d/n REST  
491 expression alone (Figure 8D, E). RGC survival was elevated to the same extent as with  
492 d/n REST expression alone (Figure 8F).

493 As an alternative approach (Figure S8A) to investigate the role of REST *in vivo*,  
494 we deleted the gene in mature RGCs via AAV2-Cre-driven recombination in mice with  
495 homozygous conditional REST alleles and the same TdTomato reporter line (REST<sup>flx/flx</sup>;  
496 STOP<sup>flx/flx</sup>TdTomato) as used in the CST repair studies: see Methods). AAV2-Cre was  
497 injected into one eye of REST<sup>flx/flx</sup>; STOP<sup>flx/flx</sup>TdTomato mice, while the contralateral  
498 control eye received an injection of AAV2 expressing GFP. REST knock-out was  
499 confirmed by tdTomato expression in the retinas of REST<sup>flx/flx</sup>; STOP<sup>flx/flx</sup>TdTomato mice  
500 exposed to AAV2-Cre, whereas no TdTomato was observed in control retinas receiving  
501 AAV2-GFP. Conditional deletion of REST in RGCs, similar to expression of d/nREST,  
502 induced considerable axon regeneration (Figure 8D, E), in this case averaging ~ 50% of  
503 the level induced by the three-way combination of *pten* deletion, rOcm, and CPT-cAMP  
504 (Figure 5B). Negative controls were pooled for the different genotypes and viruses used  
505 in these studies based on the lack of significant differences in outcomes among controls  
506 for AAV2-Cre plus REST<sup>fl/fl</sup> (strain C57/B6, Mean ± SEM: 71.07 ± 14.65) and for AAV2-  
507 d/nREST injections in wild-type 129S1 mice (Mean ± SEM: 41.57 ± 13.65; *P* = 0.09; see  
508 legend for Figure 8). In addition, as observed with d/n REST expression, deletion of REST  
509 in RGCs doubled the level of RGC survival above that seen in control retinas two weeks  
510 after optic nerve injury (Figure 8F), an effect similar to that achieved with the combinatorial  
511 treatment used to generate the transcriptional dataset.

512 Deletion of *pten* is perhaps the most effective single treatment described to date  
513 for inducing optic nerve regeneration (14, 17). On average, counteracting REST captured  
514 ~ 2/3 of the effect of *pten* deletion on axon regeneration (Figure 8E) and the full effect of  
515 *pten* deletion on RGC survival (Figure 8F). Thus, REST can be considered a major  
516 suppressor of RGC survival and optic nerve regeneration in mature mice. We also  
517 investigated whether *pten* deletion would occlude the effects of counteracting REST,  
518 which would suggest that the two share common effector pathways, or whether they might

519 show some degree of additivity. Our results point to partially additive effects on axon  
520 regeneration (Figure 8E), suggesting at least some independence of effector pathways.

521 Accompanying its effects on RGC survival and axon regeneration, expression of  
522 d/n REST increased expression of several regenerative TFs (ATF3, SOX11, pSTAT3,  
523 pCREB) in the TF regulatory network in RGCs, as assessed by immunostaining retinal  
524 sections 1 day after optic nerve injury (Figure 8G, H). At day 7, expression of genes  
525 associated with regeneration and/or survival, including *Sprr1a*, *Bdnf* and *Gap-43* were  
526 found to be increased based on qPCR using mRNA from FACS-sorted RGCs 7 days after  
527 optic nerve injury (Figure 8I:  $*P < 0.05$ ,  $**P < 0.01$ ; Methods). These findings are  
528 consistent with the elevated expression of key regenerative TFs and effector genes  
529 associated with axon growth that we observed in REST-depleted cortical motor neurons,  
530 and show that, as with spinal cord injury, REST antagonism enhances central axon  
531 regeneration. Thus, we were able to confirm the predicted repressive effects of REST on  
532 regeneration based on our systems genomic analysis in two quite distinct models of CNS  
533 injury.

534

535

## 536 **DISCUSSION**

537 We used a stepwise, systems genomics approach to identify upstream  
538 transcriptional regulators of intrinsic regeneration-associated gene expression programs  
539 in the nervous system. Multiple independent bio-informatic analyses were used to  
540 evaluate existing and newly produced gene expression datasets, all of which converged  
541 on the transcriptional repressor, REST, as a potential upstream negative regulator of a  
542 regenerative gene expression program in the CNS (Figure 1A). We then experimentally  
543 demonstrated that disrupting REST activates a core molecular program driven by a tightly  
544 controlled TF network similar to the one activated during peripheral regeneration (Figure  
545 1B). This would also predict that counteracting REST would substantially improve  
546 regeneration, which was supported in two well established models of CNS injury, the optic  
547 nerve and the corticospinal tract (CST) (Figure 1C). These data are consistent with a  
548 model whereby REST may act by suppressing the interaction and the expression of pro-  
549 regenerative TFs within the RAG network, consistent with its known function as a

550 transcriptional suppressor. Perhaps most importantly, these results firmly demonstrate for  
551 the first time that REST represses CNS regeneration *in vivo*, and conversely that its  
552 depletion or inhibition by expressing a dominant-negative mutant enhances CNS  
553 regeneration.

#### 554 **TF hierarchies reveal key regeneration-associated factors**

555 Many transcription factors are required to drive growth-associated gene programs  
556 for neuronal regeneration (ATF3: (57, 58); Jun: (59, 61); SMAD1: (62, 63); Sox11: (24,  
557 25, 65, 113); STAT3: (21, 60, 89, 114); KLF family: (22, 23, 90)). As this list continues to  
558 grow (19, 20), efficient strategies are needed to determine how they interact and which  
559 TFs are the key factors upstream of regeneration. TF binding is a dynamic process, and  
560 a TF can be present or absent from its target loci at different time points and/or under  
561 different conditions. In addition, TFs act in a combinatorial manner, forming tiered  
562 regulatory networks to drive gene expressions. Therefore, experiments like gain- or loss-  
563 of-function of a single or a few TFs at one time is unlikely to recapitulate these TF  
564 regulatory events. Here, we used an unsupervised, step-wise bio-informatic approach to  
565 characterize the regulatory network structure of regeneration-associated TFs (Figure 2A).  
566 By leveraging existing and new gene expression datasets generated in multiple labs and  
567 in PNS and CNS injury models at different timescales, we identified a core set of five TFs  
568 (Jun, SMAD1, Sox11, STAT3 and ATF3) that occupied a standard, three-tiered core  
569 regulatory network (30, 33, 34) that was conserved across all PNS datasets (Figure 2C).  
570 Each of these core pro-regenerative TFs is increased early after PNS injury (Figure S1A),  
571 in agreement with previous findings of their essential role during PNS regeneration (20,  
572 57-66) and each connection of TF pairs is experimentally supported (55, 56), adding  
573 confidence to our bio-informatic predictions.

574 By contrast, in the non-regenerating CNS (spinal cord and optic nerve), this  
575 network loses its three-tiered structure, and instead adopts a simpler, less inter-  
576 connected, dismantled structure (spinal cord: Figure 2D; optic nerve: Figure 5E-F).  
577 Remarkably, CNS neurons with enhanced regenerative capacity induced by combined  
578 genetic and molecular manipulations re-gain the complex, multi-layer TF network with  
579 higher inter-connectivity (Figure 5E-F), similar to the TF network induced in the

580 regenerating PNS (Figure 2C). In the dismantled CNS network, REST appears as a top-  
581 tier regulator, predicted to inhibit other lower-level TFs. The prediction of REST being a  
582 transcriptional repressor was further supported by an independent, unbiased TF-  
583 screening approach that evaluated ~1000 TFs and their experimentally-proven target  
584 genes, identifying REST as a top negative regulator of the gene set activated in  
585 regenerating CNS neurons (Figure 5D).

586 Independent analyses of data from different sources that were focused on  
587 identifying key upstream TFs regulating CNS regeneration all pointed to REST as a key  
588 transcriptional repressor upstream of the core pro-regenerative TFs driving RAG program  
589 expression. This prediction was supported by the findings that *Rest* was specifically  
590 upregulated across multiple CNS injury datasets (Figure S1A, 3B). When REST is  
591 inhibited, Jun, STAT3, Sox11 and ATF3, all members of the core TF regulatory network  
592 are up-regulated both in injured cortical neurons (Figure 3B) and in RGCs (Figure 8G-I).  
593 Importantly, each of these TFs has been shown independently to promote axonal  
594 regeneration, including in the injured CNS in some cases (19, 21, 22, 24, 25, 61, 66, 113,  
595 114). These observations, coupled with our data supports a model whereby their up-  
596 regulation following REST deletion directly contributes to regenerative growth. Finally,  
597 REST depletion enhances gene co-expression programs similar to those activated during  
598 peripheral regeneration (20, 115-117), involving MAPK-, cAMP-mediated, Neurotrophin-  
599 and Integrin signaling pathways driven by the core TFs (Figure 4C-D). Our data suggest  
600 a model (Figure 4G) supported by multiple lines of independent data and analyses,  
601 whereby REST is induced by CNS injury to suppress the interaction and the expression  
602 of several pro-regenerative TFs that act upstream of the RAG program. Thus, inhibition  
603 of REST would be expected to release its transcriptional brakes on this program to  
604 facilitate axon regeneration in the CNS, which was further validated in multiple  
605 experimental models of CNS injury.

## 606 **A new role for REST**

607 REST is among the most widely studied transcription factors in the CNS, having  
608 been established as a repressor of a large number of genes essential for neuronal  
609 function (78, 118, 119) and that is predicted to bind and repress close to 2000 putative



610 targets in the mammalian genome. REST and its target genes play important roles in  
611 neuronal development as well as the progression of neurological disorders. In the  
612 developing nervous system, REST is present in progenitor populations, repressing many  
613 genes involved in synaptogenesis, axon pathfinding, and neurotransmission (78, 79, 118,  
614 120), but is downregulated at the end-stage of neural differentiation to allow expression  
615 of genes that underlie the acquisition of a mature neuronal phenotype (42-45, 120). In  
616 differentiated neurons, REST is quiescent, but can be activated in response to neuronal  
617 insults such as ischemia (121, 122) or seizures (123, 124), and its expression is linked  
618 with neuronal death (122). Dysregulation of REST and its target genes has also been  
619 associated with the pathogenesis of epilepsy (125, 126), Huntington's Disease (127),  
620 aging-associated Alzheimer's Disease (128), and decreased longevity (129). To date,  
621 however, REST has not been linked to CNS repair.

622 In rodent models of neuropathic pain, REST elevation transcriptionally represses  
623 voltage-gated potassium channels in peripheral sensory neurons, resulting in hyper-  
624 excitability (130-132). Another recent study shows that REST expression transiently  
625 increases in response to peripheral injury, but is quickly repressed by an epigenetic  
626 regulator, UHRF1, which interacts with DNA methylation enzymes to restrict the  
627 transcription of REST, as well as PTEN, a suppressor of cell-intrinsic growth (133). We  
628 did not observe significant changes of *Rest* expression levels across multiple PNS injury  
629 models at different time scales (Figure S1A, PNS1-5). These findings suggest that the  
630 expression levels of REST or other intrinsic growth suppressors are tightly controlled in  
631 peripherally injured neurons to allow peripheral nerve regeneration.

632 In view of multiple lines of unbiased bioinformatic data pointing to REST as a novel  
633 inhibitor of the intrinsic growth program of CNS neurons, we investigated the effects of  
634 REST depletion in two commonly employed models of CNS injury - spinal cord damage  
635 and optic nerve injury (2, 94, 134). Our data demonstrate for the first time that inhibition  
636 of REST enhances regenerative growth in both CNS models, confirming the critical role  
637 of REST in suppressing the regenerative competence of CNS neurons. CST axons in  
638 animals with REST deletion showed substantially increased growth relative to wild-type  
639 controls. We note that although these axons did not grow across an anatomically  
640 complete SCI lesion (Figure 7B-C), inability to cross the lesion boundary after complete



641 SCI was expected, as such growth is known to require both intrinsic growth cues and  
642 external growth facilitators such as tissue or biomaterial bridges that provide growth-  
643 supportive molecules within the lesion site (8, 135-138). As a therapeutic strategy for  
644 regenerating axons across a complete SCI, it will probably be necessary to augment  
645 intrinsic growth capabilities such as REST or PTEN deletion, which activate regeneration-  
646 associated genes and pathways in CNS neurons, with an appropriate lesion-bridging  
647 substrate (8, 139).

648 In the visual system, expression of a dominant-negative (d/n) REST mutant that  
649 retains the DNA-binding domain of the protein but lacks the repressor domain enhanced  
650 axon outgrowth in mature RGCs in culture (Figure 8A-C), paralleling earlier observations  
651 on the d/n effects of overexpressing RE1 DNA sequences (140). In the presence of  
652 oncomodulin (Ocm) and a membrane-permeable, non-hydrolyzable cAMP analog,  
653 expression of d/n REST led to extraordinary levels of RGC axon outgrowth (Figure 8A-  
654 C). *In vivo*, we investigated the role of REST in optic nerve regeneration by two  
655 approaches, overexpressing the dominant-negative REST mutant and conditional  
656 deletion of the *Rest* gene in RGCs. The effect of counteracting REST was considerable;  
657 regeneration induced by counteracting REST was approximately 2/3 of that induced by  
658 PTEN deletion, a treatment that provides perhaps the strongest regeneration induced by  
659 a single genetic manipulation to date (Park et al., 2008), and roughly half the robust level  
660 of axon regeneration induced by *Pten* deletion combined with Ocm and cAMP elevation  
661 (Figure 8D-E), the potent combinatorial treatment used to generate our original  
662 regeneration RNA Seq dataset. Combining d/n REST expression with Ocm plus CPT-  
663 cAMP brought the level of regeneration even closer to that induced by the strong  
664 combinatorial treatment, while a combined treatment to knock down PTEN and counteract  
665 REST in RGCs led to considerably greater regeneration than either one alone. In addition,  
666 expression of d/n REST or REST knock-down was sufficient to double levels of RGC  
667 survival, affording the same level of neuroprotection as either combinatorial therapy or  
668 PTEN deletion alone, which is notable, since to date, few factors other than PTEN deletion  
669 enhance both RGC regeneration and survival. For example, ATF3 is pro-survival but has  
670 no effect on RGC regeneration (141); Sox11 is pro-regenerative, but when overexpressed,

671 lead to the death of alpha RGCs (25); and STAT3 is pro-regenerative, but does not  
672 increase survival (89).

### 673 **Limitations and future directions**

674 Here we demonstrate via several lines of experimental evidence that REST is an inhibitor  
675 of CNS axon regeneration. Based on multiple forms of bio-informatic and experimental  
676 analyses, we present a model whereby REST acts via repression of pro-regenerative  
677 genes, whose regulatory elements it binds. Although we know that REST does repress  
678 this regenerative program, and its reduction leads to regeneration, we cannot yet say with  
679 certainty that its effects on regeneration are solely via this pathway. Thus, we view this  
680 as a working model that warrants further testing. We also note that the genetic  
681 manipulations required for direct testing of this model (e.g. simultaneous suppression of  
682 multiple core regeneration-associated TFs in the context of REST deletion) are at the very  
683 least daunting and at the limit of current experimental tractability. It is also plausible that  
684 transcriptional regulation by REST is one of several mechanisms by which its deletion  
685 promotes cell-intrinsic growth. From this perspective, it is likely that other key regulators  
686 act synergistically with REST to control CNS regeneration. One potential REST-  
687 interacting factor could be PTEN, inhibition of which, plus Oncomodulin and cAMP  
688 elevation up-regulates a regeneration-associated gene set that is predicted to be  
689 repressed by REST (Figure 5G, S5 B-D). As a protein phosphatase, PTEN antagonizes  
690 the PI3K-AKT-mTOR pathway to inhibit protein translation, cell cycle progression and cell  
691 survival (63), as well as transcriptional regulation of cell-growth-associated genes through  
692 inhibition (142-144). Our findings indicate that REST is likely not acting via eliciting  
693 changes in PTEN, or the downstream canonical mTOR pathway to regulate regeneration,  
694 as our gene expression data show no change in the levels of *Pten* with REST deletion  
695 (Figure S3E), nor do we see changes in phosphorylation of ribosomal protein S6, which  
696 would be indicative of changes in the mTOR pathway (Figure S8 B-C). In addition, we  
697 observed additive effects of *Pten* deletion combined with counteracting REST, suggesting  
698 that the two treatments may activate downstream effector pathways that are at least  
699 partially separate (Figure 8E-H). Future studies on how REST interacts with PTEN and  
700 other pro-regenerative manipulations will be important in optimizing therapeutic strategies  
701 for CNS repair.

702 Further studies will also be required to clarify the precise molecular mechanisms  
703 by which REST acts on the core TF network in the RAG complex to regulate regeneration-  
704 associated pathways during CNS repair, and to explore other possible mechanisms.  
705 REST may be recruited directly to the regulatory sites for repressing regeneration-  
706 associated transcription following CNS injury. ChIP-seq studies have shown that REST  
707 can directly bind to regenerative TFs such as Sox11, KLF6, Jun and STAT3 (79, 81, 145).  
708 Whether REST binds and represses additional regenerative factors in the context of  
709 axonal injury needs to be further investigated. It is also possible that REST deploys  
710 additional mechanisms of regulating CNS regeneration in addition to acting directly on  
711 the core TFs. As a transcriptional regulator, REST can induce chromatin remodeling (46,  
712 47), a process that rearranges the chromatin to facilitate or prevent gene transcription.  
713 Overall, future studies on a genome-wide profiling of REST occupancy induced by CNS  
714 injury or chromatin regulatory changes with and without REST inhibition in CNS neurons  
715 will be necessary to identify how REST regulates regeneration-associated transcription  
716 to enhance CNS repair. In addition, the mechanisms by which REST itself is regulated in  
717 the context of CNS injury is unclear. Others have shown that REST can be regulated  
718 post-transcriptionally (146), post-translationally via ubiquitination/deubiquitination (147,  
719 148), and by cytoplasmic sequestration (127). Thus, investigating how REST is regulated  
720 in CNS neurons in growth-permissive or non-permissive states may further illuminate  
721 non-transcriptional mechanisms underlying CNS regeneration. The unbiased discovery  
722 of REST as a regulator of CNS axon regeneration and the validation of REST's new role  
723 across different models of CNS injury provide a proof of concept for the power of our bio-  
724 informatic framework as a platform for discovery. In view of the complexity of how REST  
725 interacts with the genome, further work will be required to understand more fully how  
726 REST regulates the regenerative state of CNS neurons. At the same time, it will be  
727 important to investigate the potential of REST manipulation to enhance the ability of other  
728 pro-regenerative treatments to improve outcome after CNS injury and to move such  
729 treatments towards clinical application.

730

731 **Methods**

732 **Animals.** Mouse lines, including 129S1, C57BL/6J, loxP-REST-loxP (REST<sup>flx/flx</sup>), B6.Cg-  
733 Tg(Thy1-CFP)23Jrs/J, and Rosa26-CAG-loxP-STOP-loxP-tdTomato (STOP<sup>flx/flx</sup>  
734 TdTomato), were purchased from Jackson Laboratory. REST<sup>flx/flx</sup>; tdTomato homozygous  
735 mice were generated by crossing REST<sup>flx/flx</sup> (107) and STOP<sup>flx/flx</sup> TdTomato mice. Young  
736 adult mice between 4-6 weeks old including both sexes were used for all experiments in  
737 spinal cord studies and 8 -12 week old animals in optic nerve regeneration studies.  
738 Experiments performed at University of California, Los Angeles were approved by the  
739 Animal Research Committee of the Office for Protection of Research Subjects.  
740 Experiments performed at Boston Children's Hospital were approved by the Institutional  
741 Animal Care and Use Committee (IACUC).

742 **Spinal cord injury and corticospinal tract (CST) injections.** Surgical procedures for  
743 spinal cord injury and CST injections in mice were similar to those described previously  
744 (8, 108, 109, 149), and were conducted under general anesthesia with isoflurane using  
745 an operating microscope (Zeiss, Oberkochen, Germany), and rodent stereotaxic  
746 apparatus (David Kopf, Tujunga, CA). The adeno-associated virus-green fluorescent  
747 protein (AAV-GFP) or adeno-associated virus expressing Cre recombinase (AAV-Cre)  
748 were obtained from Boston Children's Hospital Viral Vector Core. The viruses referred to  
749 as AAV-GFP and AAV-Cre were AAV2/8.CAG.eGFP.WPRE.polyA and  
750 AAV2/8.CAG.Cre-HA.WPRE.polyA, respectively. A total of 2  $\mu$ l AAV2/8-GFP or AAV2/8-  
751 Cre virus at a titer of  $\sim 10^{13}$  gc/ml was injected into the left cerebral motor cortex at the  
752 following coordinates (in mm): anteroposterior/mediolateral: 0.5/1.5, 0.0/1.5, -0.5/1.5, -  
753 1.0/1.5, at a depth of 0.5 mm. Four weeks later, a laminectomy was performed at T10,  
754 and the spinal cord was crushed using .1mm-wide customized forceps. To trace  
755 corticospinal tract axons, 2  $\mu$ l biotinylated dextran amine 10,000 (BDA, Invitrogen, 10%  
756 wt/vol in sterile saline) was injected at the same coordinates as the AAVs into the left  
757 motor cortex six weeks after SCI. Mice that underwent surgical procedures were placed  
758 on a warming blanket and received an analgesic before wound closure and every 12 h for  
759 48 h post-injury.

760 ***Immunostaining of spinal cord and cortex.*** Spinal cords were recovered and stained  
761 as previously described (8, 109). Following terminal anesthesia by pentobarbital, mice  
762 were perfused transcardially with 10% formalin (Sigma). Spinal cords and brains were  
763 removed, post-fixed overnight, transferred to buffered 30% sucrose for 48 h, embedded  
764 in O.C.T. Compound (Tissue-Tek, Sakura-Finetek/VWR) and cryostat-sectioned at  
765 30  $\mu$ m. Serial horizontal sections of spinal cord containing the lesion sites and brain  
766 containing the viral injection sites were cut and processed for immunostaining. The  
767 following primary antibodies were used: GFAP (DAKO, 1:1000, free-floating), GAP43  
768 (1:1000, Benowitz lab), Synaptophysin (Synaptic Systems, 1:1000, free-floating), RFP  
769 (1:500, Invitrogen, free-floating), and NeuN (1:500, Millipore, free-floating). BDA tracing  
770 was visualized with streptavidin-HRP (1:300, PerkinElmer) antibodies plus Cy3-TSA  
771 (1:200, PerkinElmer). Sections were cover-slipped using Prolong Diamond Antifade  
772 Mounting media with DAPI (ThermoFisher) to stain cell nuclei.

773 ***Quantitation involving CST axons.*** To quantify total labeled CST axons, we counted  
774 intercepts of BDA-labeled fibers with dorsal-ventral lines drawn at defined distances  
775 rostral to the lesion center. Similar lines were drawn and axons counted in the intact axon  
776 tract 3 mm proximal to control for potential variability in the fluorescence intensity among  
777 animals. Fibers were counted on at least two sections per mouse, and the number of  
778 intercepts near or in the lesion was expressed as percent of axons in the intact tract  
779 divided by the number of evaluated sections. To quantify the number of branching axons  
780 from the main CST, three 0.8 x 0.8 mm<sup>2</sup> squares (Z1, Z2, Z3) were drawn along the  
781 central canal at defined distances rostral to the crush site. The number of axons were  
782 counted in each square, and are expressed as percent of area per section for each mouse.  
783 The number of GAP43- or Synaptophysin- expressing axons co-labeled with BDA were  
784 counted at 0.5 mm and 3 mm rostral to the SCI crush, and are expressed as percent of  
785 BDA labeled axons at respective distances. We examined BDA labeling 3 mm caudal to  
786 the lesion center to make sure the SCI lesions were complete. All axon counts were  
787 carried out by an investigator blind to the identity of the cases.

788 ***Optic nerve crush and intraocular injections.*** Surgical procedures for optic nerve injury  
789 and intraocular injections in mice were similar to those described previously (15, 16, 86,

790 112, 150). To investigate REST functions *in vivo*, we either deleted REST in RGCs or  
791 expressed a dominant-negative mutant form of REST (111) (d/n REST, gift of Dr. Gail  
792 Mandel, OHSU). For the former, REST<sup>flx/flx</sup>-tdTomato mice received an intraocular  
793 injection of either AAV2-CAG-Cre.WPREpA (AAV2-Cre, to preferentially delete the gene  
794 in RGCs) or, as a control, AAV2-CAG-eGFP.WPREpA (AAV2-GFP). In the latter studies,  
795 129S1 wildtype mice received AAV2-CAG-d/n human REST-HA-SV40pA (AAV2-  
796 d/nREST) to inactivate REST function or AAV2-GFP as a control. All viruses were injected  
797 in a volume of 3  $\mu$ l and a titer of  $1 \times 10^{13}$  gc/ml 2 weeks prior to optic nerve crush to insure  
798 adequate time for gene deletion or transgene expression at the time of nerve damage.  
799 Two days prior to the end of a 14-day survival period, cholera toxin B subunit (CTB, 3  
800  $\mu$ l/eye, 2  $\mu$ g/ $\mu$ l, List Biological Laboratories, Inc., 103B) was injected intraocularly as an  
801 anterograde tracer to label axons regenerating through the optic nerve.

802 In some studies, 129S1 mice received an intraocular injection of AAV2-d/nREST or an  
803 AAV2 control virus two weeks before the optic nerve crush and were euthanized at day 1  
804 or day 7 after nerve injury. Retinas from these mice were prepared for immunostaining of  
805 serial sections (details in Methods: *Immunostaining of retinal sections and intensity*  
806 *quantitation*).

807 To investigate the transcriptome of RGCs during optic nerve regeneration or after  
808 counteracting REST, we carried out optic nerve crush surgery with different intraocular  
809 treatments *in vivo*, then used FACS to isolate RGCs for subsequent analyses (details in  
810 Methods: *FACS isolation of retinal ganglion cells*)

811 ***Quantitation of optic nerve regeneration and RGC survival.*** Following transcardial  
812 perfusion with saline followed by 4% paraformaldehyde (PFA), optic nerves and retinas  
813 were dissected out and post-fixed with 4% PFA for 2 hours (RT). Nerves were transferred  
814 to 30% sucrose at 4°C overnight before being frozen in O.C.T. Compound (Tissue-Tek,  
815 Sakura-Finetek/VWR) and sectioned longitudinally on a cryostat at 14  $\mu$ m thickness.  
816 Regenerating axons were visualized by immunostaining for CTB (1:500, Genway Biotech,  
817 GWB-7B96E4) and were quantified in 4-8 sections per case to obtain estimates of the  
818 total number of regenerating axons at 0.5 mm distally from the injury site as described



819 (86, 150). Whole retinas were immunostained for  $\beta$ III-tubulin (1:500, free-floating. Abcam)  
820 to identify RGCs, and RGC survival was evaluated in 8 pre-designated fields in each  
821 retina as described (86).

822 ***Immunostaining of retinal sections and quantitation of signals.*** Animals injected  
823 intraocularly with AAV2-d/nREST or a control virus underwent optic nerve crush surgery  
824 14 days later and were euthanized and perfused after another 1 day or 7 days (Methods:  
825 *Optic nerve crush and intraocular injections*). Eyes were dissected out, post-fixed for 2  
826 hours at RT, then transferred in 30% sucrose at 4°C overnight. After embedding in O.C.T.  
827 and cryostat-sectioned at 14  $\mu$ m, retinal sections were immunostained with primary  
828 antibodies against various proteins, including several transcription factors (anti-ATF3,  
829 1:100, Abcam Ab207434; anti-SOX11, 1:500, Millipore ABN105; anti-pSTAT3, 1:200, Cell  
830 Signaling D4769; anti-pCREB, 1:100, Alomone Labs; and anti- $\beta$ III tubulin [TUJ1], 1:500,  
831 Biologend to identify RGCs) at 4°C overnight followed by the appropriate fluorescent  
832 secondary antibodies the next day. Stained retinal sections were imaged using equal  
833 exposure conditions across all sections in both control and treated groups. Staining  
834 intensity was measured with Image J software on each individual RGC that was labeled  
835 by the TUJ1 antibody, and data were averaged from 50 - 100 consecutively encountered  
836 RGCs across 3 different areas from each retina, 3 – 4 retinas per group, and was  
837 compared between the control and treatment groups for each antibody.

838 ***Retrograde labeling of RGCs and preparation of dissociated retinal cultures.*** The  
839 procedure for retrograde labeling of RGCs has been described previously (87, 112).  
840 Briefly, to distinguish RGCs from other cells in dissociated mixed retinal cultures, we  
841 injected 2% of Fluorogold (FG, Fluorochrome) into the superior colliculus (SC) bilaterally  
842 in adult rats. At the same time, rats received intravitreal injections of either AAV2-d/n  
843 REST or AAV2-GFP viruses. After allowing one week for FG transport and viral gene  
844 expression in RGCs (86, 87, 112), retinas were dissected, dissociated with papain, and  
845 the dissociated retinal cells were plated on poly-L-lysine pre-coated culture plates. To  
846 obtain a baseline of plated RGCs from different retinas, we carried out an initial  
847 quantitation of FG-labeled RGC numbers in culture 5 – 12 hours after plating cells. Axon  
848 outgrowth and RGC survival were evaluated after 3 days in culture, and each



849 experimental condition was tested in quadruplicate. Counting was carried out using a  
850 fluorescent inverted microscope by an observer who was blind to treatment. RGCs were  
851 identified by FG labeling under fluorescent illumination, then evaluated for axon growth  
852 using phase-contrast to obtain the percentage of RGCs that extended axons  $\geq 30 \mu\text{m}$  in  
853 length. Cell survival is reported as the number of FG-positive RGCs per 40X microscope  
854 field averaged over  $\geq 30$  pre-specified fields per well. The RGC numbers counted at D3  
855 were first normalized by their own initial number at 5 -12 hours after plating, then averaged  
856 within the group. In some cases, cultured cells were immunostained with a rabbit  
857 monoclonal antibody to GAP-43 (1:500, Abcam, Cat#: ab75810) to visualize regenerating  
858 axons.

859 ***Dissociated dorsal root ganglion neuronal cultures and neurite outgrowth assay.***

860 Adult C57BL/6J dissociated DRG cells were plated at a concentration of 5,000 – 10,000  
861 cells / ml in tissue culture plates coated with poly-L-lysine (Invitrogen, 0.1 mg/ml) and  
862 laminin (Invitrogen, 2 ug/ml) only or with CSPG (Millipore, 5 ug/ml) cultured in Neurobasal  
863 A medium (Invitrogen) containing B27 supplement, penicillin, streptomycin, 1 mM L-  
864 glutamine, 50 ng/ml NGF, and 10 mM AraC at 37°C. REST overexpression was  
865 performed by transducing DRG neurons with lentiviral constructs containing either REST  
866 (Lv135-REST) or humanized luciferase protein (Lv135-hLuc) as a control driven by the  
867 CMV promoter (GeneCopoeia). DRG neurons were replated 7 days after the viral  
868 infection. Replated neurons were allowed to grow for another 17-24 hr before quantifying  
869 neurite outgrowth. To test neurite growth on laminin or CSPG, DRG neurons dissected  
870 from REST<sup>flx/flx</sup> mice were dissociated and REST was depleted by infecting neurons with  
871 AAV-CRE (experimental) or AAV-GFP (control), the same AAVs used in the Methods  
872 section “*Spinal cord injury and corticospinal tract (CST) injections*”, at a viral titer of  
873  $\sim 100,000$  genome copies per cell. Neurite growth was measured after 7 days, and each  
874 experimental condition was tested in triplicate. To stain DRG neurites, cells were fixed  
875 with 4% paraformaldehyde and blocked for one hour at room temperature in PBS with  
876 0.05% Tween-20 + 0.01% Triton-X + 1% BSA + 5% goat serum, followed by primary  
877 antibody incubation with  $\beta$ -III-tubulin (Biolegend, 1:500) overnight at 4 °C in blocking  
878 solutions and secondary antibody (Invitrogen, 1:500) for 1-2 hr at room temperature. For  
879 quantification of DRG neurites, at least 9 images were randomly taken from each replicate

880 using a Zeiss Confocal Microscope at 20x. Neurites were counted using Imaris Surface  
881 Rendering function, and the average neurite surface per neuron was quantified.

882 **qRT-PCR.** RNA from various treatment groups was extracted using the RNeasy kit  
883 (Qiagen), reverse-transcribed to cDNA with iScript cDNA Synthesis kit (Bio-Rad) or  
884 Quantitect Reverse Transcription kit (Qiagen) for low-input samples. Real-time qPCR was  
885 carried out with iTaq Universal (Bio-Rad) or Quantitect (Qiagen) SYBR Green supermix.  
886 The primers used in qPCRs were:

887  
888 SPRR1a F: GTCCATAGCCAAGCCTGAAGA; R: GGCAATGGGACTCATAAGCAG;  
889 GAP-43 F: GTTTCCTCTCCTGTCCTGCT; R: CCACACGCACCAGATCAAAA.  
890 BDNF F: CACTGTCACCTGCTCTCTAGGGA; R: TTTACAATAGGCTTCTGATGTGG;  
891 ATF3 F: CTGGGATTGGTAACCTGGAGTTA; R: TGACAGGCTAGGAATACTGG;  
892 REST F: CGACCAGGTAATCGCAGCAG; R: CATGGCCTTAACCAACGACA;  
893 18S F: CGGCTACCACATCCAAGGAA; 18S R: GCTGGAATTACCGCGGCT. Relative  
894 expression levels in experimental groups were first normalized to those of the reference  
895 gene 18S rRNA, then normalized by the relevant control group depending on the  
896 experimental design. Statistical significance among groups was evaluated by one-way  
897 ANOVA followed by Bonferroni or Tukey corrections.

898 **Western blots.** Lysates from DRG neurons were run on 4-12% Bis-Tris gradient gels and  
899 proteins were transferred to PVDF membranes that were incubated with antibodies to  
900 REST (Abcam, 1:1000), using anti- $\beta$ -actin as a loading control. Quantitation of western  
901 blot results was carried out with ImageJ software.

902 **FACS isolation of adult cortical motor neurons.** Surgeries and AAV injections were  
903 carried out in the same way as described in the Methods section "*Spinal cord injury and*  
904 *corticospinal tract (CST) injections*". In order to induce neuron-specific REST depletion,  
905 we used AAVs expressing GFP or Cre recombinase under the human synapsin promoter.  
906 Adult mouse brain tissue was dissociated as previously described (151). Briefly,  
907 sensorimotor cortex injected with AAV-Syn-GFP or AAV-Syn-CRE to induce tdTomato  
908 expression from REST<sup>flx/flx</sup>; tdTomato mice was immediately dissected into ice-cold

909 Hibernate A without calcium (BrainBits, HA – Ca). Tissue was digested by activated  
910 papain (Worthington, resuspended in 5 ml HA-Ca) with 100  $\mu$ l DNase I (2 mg/ml, Roche)  
911 in a 37 °C incubator shaking orbitally for 30 min. Digested tissue was triturated gently until  
912 clumps disappeared, spun down, and resuspended in 3 ml HA –Ca containing 10% v/v  
913 ovomucoid (Worthington, resuspended in 32 ml HA –Ca). Cell debris was removed using  
914 discontinuous density gradient containing 3 ml tissue mixture on top of 5 ml ovomucoid  
915 solution. Cells were spun down at 70 x G for 6 min and the pellet was resuspended in  
916 1.8 ml Hibernate A low fluorescence (HA-LF; BrainBits) to create a mononuclear cell  
917 suspension. Miltenyi myelin removal kit was used to further reduce the amount of debris  
918 according to the manufacturer’s protocol. Briefly, 200  $\mu$ l myelin removal beads (Miltenyi)  
919 were added to the cell suspension and incubated at 4 °C for 15 min, then the cell  
920 suspension was centrifuged at 300 x G for 10 min at 4 °C. The pellet was resuspended in  
921 1 ml of HA-LF and applied to LS columns (Miltenyi) attached to MACS magnetic separator  
922 in order to remove beads with myelin. Flow-through, as well as two -- 1 ml washes with  
923 HA-LF, were collected, centrifuged at 600 x G for 5 min at 4 °C and resuspended in 750  $\mu$ l  
924 HA-LF. Myelin-depleted samples were labeled with live cell marker DRAQ5 (1  $\mu$ l per  
925 sample; Thermo Fisher Scientific) and dead cell marker NucBlue (1 drop per sample;  
926 Invitrogen). Samples were FACS-sorted on a Becton Dickinson FACS Aria cell sorter  
927 gating for DAPI–/DRAQ5+/GFP+ cells directly collected in 100  $\mu$ l of RA1 lysis buffer with  
928 2  $\mu$ l tris(2-carboxyethyl)phosphine (TCEP) from NucleoSpin RNA XS kit (Clontech).

929 ***FACS isolation of retinal ganglion cells.*** To investigate the transcriptome of RGCs  
930 undergoing axon regeneration, B6.Cg-Tg(Thy1-CFP)23Jrs/J mice, which express cyan-  
931 fluorescent protein selectively in RGCs (96), received intraocular injections of either a well  
932 characterized adeno-associated virus expressing shRNA against PTEN mRNA (97) and  
933 mCherry (AAV2-H1-shPten.mCherry-WPRE-bGHpA, in short: AAV2-shPten.mCherry),  
934 or a control virus expressing shLuciferase.mCherry (AAV2-H1-shLuc.mCherry-WPRE-  
935 bGHpA, in short: AAV2-shLuc.mCherry). After allowing two weeks for expression of virally  
936 encoded genes, mice underwent optic nerve crush. Experimental mice received an  
937 intraocular injection of recombinant oncomodulin (rOcm, 90 ng) plus CPT-cAMP (cAMP,  
938 50  $\mu$ M, total volume = 3  $\mu$ l); control mice received intraocular saline. At one, three or five  
939 days post-surgery, mice were euthanized, retinas were dissected and dissociated by

940 gentle trituration in the presence of papain, and cells were separated by fluorescent-  
941 activated cell sorting (FACS, BD Biosciences) on the basis of being positive for both CFP  
942 and mCherry (*i.e.*, virally transfected RGCs). We typically obtained 2,000 – 11,000 RGCs  
943 per retina and pooled RGCs from 2-3 similarly treated retinas for one sample depending  
944 on the number of sorted cells; each condition was repeated at least 8 times in independent  
945 experiments.

946 To investigate the effects of REST manipulations on regeneration-associated TFs and  
947 other genes, we injected WT 129S1 mice intravitreally with AAV2-d/nREST (vs. AAV2-  
948 GFP in controls) and, at the same time, injected Fluorogold (Fluorochrome) into the  
949 superior colliculus (SC) to retrogradely label RGCs. The optic nerve was crushed two  
950 weeks later and, after allowing a one week survival period, we euthanized mice, dissected  
951 the retinas, dissociated cells (for details see retinal dissociated cell culture) and selected  
952 FG-positive RGCs by FACS. RNA from sorted RGCs was extracted for each sample and  
953 prepared for real-time qPCR analysis.

954 ***Transcriptional regulatory network analysis.*** A stepwise pipeline was used to  
955 construct a hierarchical TF network from gene expression datasets. Step 1: The Algorithm  
956 for Reconstruction of Accurate Cellular Networks (ARACNe) (48) was applied to each of  
957 the gene expression profiling datasets to infer directionality among TFs using RTN  
958 package (152). Pair-wise mutual information (MI) scores were computed and non-  
959 significant associations were removed by permutation analysis (permutation = 100; FDR  
960 adjusted p value < 0.05; consensus score = 95%). Unstable interactions were removed  
961 by bootstrapping, and indirect interactions such as two genes connected by intermediate  
962 steps were removed by data-processing inequality (DPI) of the ARACNe algorithm. Step  
963 2: To further confirm the directionality inferred by ARACNe, we examined evidence of  
964 physical TF-target binding observed by multiple ChIP-Seq or ChIP-ChIP databases (30,  
965 55). Step 3: To define the hierarchical structure of the directed TF network, we used a  
966 graph-theoretical algorithm called *vertex-sort* (33), which identifies strongly connected  
967 components and applies the leaf removal algorithm on the graph and on its transpose  
968 which can identify the precise topological ordering of members in any directed network  
969 based on the number of connections that start from or end at each TF, indicating whether

970 a TF is more regulating or more regulated. This allows for an approximate stratification of  
971 TFs within each dataset. Edges and nodes in the network were visualized by igraph R  
972 package (<https://igraph.org/r/>). Centrality statistics of each TF node was calculated using  
973 qgraph R package *centrality\_auto* () function.

974 **RNA-seq library preparation.** RNA from FACS-sorted neurons of the sensorimotor  
975 cortex (~1000 cells) was isolated with the NucleoSpin RNA XS kit (CloneTech) according  
976 to the manufacturer's protocol. RNA-seq libraries for cortical motor neurons were  
977 prepared with the QuantSeq 3'mRNA-Seq library prep kit FWD for Illumina (Lexogen)  
978 following the manufacturer's instructions, while RNA-seq libraries for RGCs were  
979 generated using TruSeq with RiboZero gold following the manufacturers's instructions.  
980 The cDNA was fragmented to 300 base pairs (bp) using the Covaris M220 (Covaris), and  
981 then the manufacturer's instructions were followed for end repair, adaptor ligation, and  
982 library amplification. The libraries were quantified by the Qubit dsDNA HS Assay Kit  
983 (Molecular Probes); Library size distribution and molar concentration of cDNA molecules  
984 in each library were determined by the Agilent High Sensitivity DNA Assay on an Agilent  
985 2200 TapeStation system. Libraries were multiplexed into a single pool and sequenced  
986 using a HiSeq4000 instrument (Illumina, San Diego, CA) to generate 69 bp single-end  
987 reads. The average read depth for each library is ~11 million for cortical motor neurons  
988 and ~33 million for RGCs.

989 **RNA-seq read alignment and processing.** Sensorimotor cortex neuronal RNA-seq data  
990 were mapped to the reference genome (mm10 / GRCm38) using STAR (153). Alignment  
991 and duplication metrics were collected using PICARD tools functions  
992 *CollectRnaSeqMetrics* and *MarkDuplicates* respectively  
993 (<http://broadinstitute.github.io/picard/>). Transcript abundance from aligned reads were  
994 quantified by Salmon (154), followed by summarization to the gene level using the R  
995 package *Tximport* (155). Sequencing depth was normalized between samples using  
996 geometric mean (GEO) in DESeq2 package (156). Removal of unwanted variation (RUV)  
997 was used to remove batch effects (157) and genes with no counts in over 50% of the  
998 samples were removed.

999 **Gene set enrichment analysis (GSEA).** GSEA v2.0 software with default settings (98)  
1000 was used to identify upstream TFs of the genes associated with the combined pro-  
1001 regenerative treatments of AAV2-sh.*pten*, Oncomodulin plus CPT-cAMP. These genes  
1002 were ranked by their correlations of expression changes with treatments measured by  
1003 directional p-value, which is calculated as  $-\text{sign}(\log \text{Treatment/Control}) * (\log_{10} \text{p-value})$ . A  
1004 positive correlation indicates up-regulation of a gene by pro-regenerative treatment, while  
1005 a negative correlation indicates down-regulation. A total of 1137 gene sets known to be  
1006 targeted by transcription factors were downloaded from MsigDB (v5.1), and each set of  
1007 the TF target genes were compared to the genes associated with the pro-regenerative  
1008 treatments. An enrichment score (ES) is returned for each comparison, which represents  
1009 the degree to which the TF-target list is over-represented at the top or bottom of the  
1010 ranked gene list. The score is calculated by walking down the gene list, increasing a  
1011 running-sum statistic when we encounter a gene in the TF-target list and decreasing when  
1012 it is not. The magnitude of the increment depends on the gene statistics so as to  
1013 determine whether a specific set of a TF's target genes is randomly distributed throughout  
1014 genes of interest, or primarily found at the top or bottom.

1015 **Differential gene expression.** Principle component analysis (PCA) of the normalized  
1016 expression data (first five PCs) was correlated with potential technical covariates,  
1017 including sex, aligning and sequencing bias calculated from STAR and Picard  
1018 respectively. Differential gene expression by limma voom (158) was performed on  
1019 normalized gene counts, including the first two PCs of aligning and sequencing bias as  
1020 covariates:  $\sim \text{Genotype} + \text{AlignSeq.PC1} + \text{AlignSeq.PC2}$ . Differentially expressed genes  
1021 were determined at FDR p value  $< 0.1$  (Supplemental Table 1). Gene overlap analysis  
1022 between DEGs and REST targeted gene sets was performed using the R package  
1023 GeneOverlap. One-tailed P values were used (equivalent to hypergeometric P value)  
1024 since we do not assume enrichment a priori.

1025 **Gene Ontology Analysis.** GO term enrichment analysis was performed using the  
1026 gProfileR package (159) and Ingenuity Pathway Analysis (IPA) Software (Qiagen), using  
1027 expressed genes in each of the normalized dataset as background. A maximum of top 10  
1028 canonical biological pathways, disease and function from each analysis were chosen from



1029 GO terms with FDR of p values < 0.05 and at least 10 genes overlapping the test data.  
1030 The R package clusterProfiler (160) was used to plot the DEGs connecting to a specific  
1031 GO term, with source code modified to accept GO terms from gProfileR and IPA.

1032 **Weighted gene co-expression network analysis.** Sequencing and aligning covariates  
1033 were regressed out from normalized expression data using a linear model. Co-expression  
1034 network was constructed using the WGCNA package (82). Briefly, pair-wise Pearson  
1035 correlations between each gene pair were calculated and transformed to a signed  
1036 adjacency matrix using a power of 10, as it was the smallest threshold that resulted in a  
1037 scale-free  $R^2$  fit of 0.8. The adjacency matrix was used to construct a topological overlap  
1038 dissimilarity matrix, from which hierarchical clustering of genes as modules were  
1039 determined by a dynamic tree-cutting algorithm (Supplemental Table 3).

1040 **WGCNA module annotation.** To classify up- or down-regulated modules, the module  
1041 eigengene, defined as the first principle component of a module that explains the  
1042 maximum possible variability of that module, was related to genotype (wild-type vs REST  
1043 cKO) using a linear model. Modules were considered to be significantly associated with  
1044 the phenotype when Bonferroni corrected p values are less than 0.05. As a first step  
1045 towards functional annotation, a hypergeometric analysis was used to examine each  
1046 module's association with the regeneration-associated gene (RAGs) module known to be  
1047 activated by peripheral injury (Chandran et al., 2016). Modules were considered to be  
1048 significantly associated with the RAG program when Bonferroni corrected p values are  
1049 less than 0.05. To further annotate modules at a general level, we applied gene ontology  
1050 (GO) enrichment analyses on each module. We also calculated Pearson correlations  
1051 between each gene and each module eigengene as a gene's module membership  
1052 (Supplemental Table 3), and hub genes were defined as being those with highest  
1053 correlations ( $kME > 0.7$ ), which represent the most central genes in the co-expression  
1054 network.

1055 **Protein-protein interaction (PPI) network analysis.** We established interactions of  
1056 proteins encoded by genes from each of the co-expression modules (RESTUP1 [202  
1057 genes], RESTUP3 [636 genes], and RAG module [286 genes]) using InWeb database,



1058 which combines reported protein interactions from MINT, BIND, IntAct, KEGG annotated  
1059 protein-protein interactions (PPrel), KEGG Enzymes involved in neighboring steps  
1060 (ECrel), and Reactome (161, 162). The significance of PPIs within the network was further  
1061 determined by DAPPLE, which uses a within-degree within-node permutation method that  
1062 allows us to rank PPI hubs by P value. The PPI networks were visualized by igraph R  
1063 package (<https://igraph.org/r/>), or Ingenuity Pathway Analysis (IPA) Software (Qiagen)

1064 **Acknowledgments**

1065 We are grateful for the support of the Dr. Miriam and Sheldon G. Adelson Medical  
1066 Research Foundation (DHG, LB, CJW, MS), the National Eye Institute (U01EY027261-  
1067 01 to LB, JLG), U.S. Department of Defense (CDMRP W81XWH-16-1-0043 to LB,  
1068 JLG), and NICHD IDDRC HD018655 (Imaging, Cell-Sorting, to CJW, LB). We also wish  
1069 to thank Dr. Gail Mandel (Oregon Health Sciences Univ.), Drs. Mihaela Stavarache and  
1070 Michael Kaplitt (Weill Cornell Medical College) for generously providing viral vectors and  
1071 advice, and Dr. Jenny Hsieh (University of Texas at San Antonio) for providing the initial  
1072 REST<sup>flx/flx</sup> breeder mice.

1073

1074 **Author Contributions**

1075 Y.C., Y.Y., M.V.S., L.I.B. and D.H.G. designed and directed the experiments and guided  
1076 the analysis. Y.C., Y.Y., L.I.B. and D.H.G. prepared the figures and wrote the  
1077 manuscript. Y.C. performed bioinformatic analyses on the RNA-seq datasets of cortical  
1078 motor neurons and RGCs. A.Z. performed transcription factor network analysis on the  
1079 microarray datasets. Y.C. and A.Z. performed experiments on mouse DRG cultures with  
1080 guidance from C.J.W. Y.Y. performed experiments on mouse RGC cultures and 293T  
1081 cells. Y.C., A.M.B., K.G., Y.A., and K.P. performed SCI experiments and collected brain  
1082 and spinal cord samples for immunostaining. Y.C., K.G. and J. Ou processed cortical  
1083 motor neurons and prepared RNA-seq libraries. Y.Y. and H.Y.G. conducted optic nerve  
1084 crush experiments, processed retina for immunostaining and RGCs for RT-PCR and  
1085 RNA-seq. R.K. performed initial processing of RNA-seq data from RGCs. Y.C., A.Z.,  
1086 and C.J.K. bred the REST<sup>flx/flx</sup> and REST<sup>flx/flx</sup>; STOP<sup>flx/flx</sup>-TdTomato mice. All authors  
1087 discussed the results and provided comments and revisions on the manuscript.

1088

1089 **Ethics Declarations**

1090 The authors declare no competing interests.

1091

1092 **Data Availability**

1093 The accession numbers for the data generated in this paper are GSE141583 and  
1094 GSE142881.

1095

1096 **Code Availability**

1097 All code for processing and analyzing the data presented in this work are available upon  
1098 request.

1099

1100 **Supplemental Tables**

1101 **Table S1.** Differentially expressed genes (DEGs) comparing wild-type and REST  
1102 knockout cortical motor neurons at 0, 1, 3, 7 days after SCI.

1103 **Table S2.** Annotation of molecules in the regeneration-associated protein-protein  
1104 interaction network in Figure 4D.

1105 **Table S3.** Module eigengenes (MEs) of co-expression gene networks and module  
1106 membership of each gene in RNA-seq of wild-type or REST knockout cortical motor  
1107 neurons in sham or SCI conditions.

1108 **Table S4.** Expression level changes of REST-repressed genes predicted by  
1109 ARACNe comparing RGCs sorted at 1, 3, 5 days after optic nerve crush with pro-  
1110 regenerative treatment to non-regenerative RGCs with control treatment.

1111

## 1112 References

- 1113 1. S. R. Cajal, *Cajal's degeneration and regeneration of the nervous system*. (History of  
1114 Neuroscience, 1991).
- 1115 2. Z. He, Y. Jin, Intrinsic Control of Axon Regeneration. *Neuron* **90**, 437-451 (2016).
- 1116 3. J. W. Fawcett, J. Verhaagen, Intrinsic Determinants of Axon Regeneration. *Dev*  
1117 *Neurobiol* **78**, 890-897 (2018).
- 1118 4. J. Silver, J. H. Miller, Regeneration beyond the glial scar. *Nature Reviews Neuroscience*  
1119 **5**, 146-156 (2004).
- 1120 5. M. T. Filbin, Myelin-associated inhibitors of axonal regeneration in the adult mammalian  
1121 CNS. *Nat Rev Neurosci* **4**, 703-713 (2003).
- 1122 6. N. Klapka, H. W. Muller, Collagen matrix in spinal cord injury. *J Neurotrauma* **23**, 422-  
1123 435 (2006).
- 1124 7. T. M. O'Shea, J. E. Burda, M. V. Sofroniew, Cell biology of spinal cord injury and repair.  
1125 *J Clin Invest* **127**, 3259-3270 (2017).
- 1126 8. M. A. Anderson *et al.*, Required growth facilitators propel axon regeneration across  
1127 complete spinal cord injury. *Nature* **561**, 396 (2018).
- 1128 9. B. Zheng *et al.*, Genetic deletion of the Nogo receptor does not reduce neurite inhibition  
1129 in vitro or promote corticospinal tract regeneration in vivo. (2005).
- 1130 10. J. K. Lee *et al.*, Combined genetic attenuation of myelin and semaphorin-mediated  
1131 growth inhibition is insufficient to promote serotonergic axon regeneration. *J Neurosci*  
1132 **30**, 10899-10904 (2010).
- 1133 11. D. Fischer, V. Petkova, S. Thanos, L. I. Benowitz, Switching mature retinal ganglion cells  
1134 to a robust growth state in vivo: gene expression and synergy with RhoA inactivation. *J*  
1135 *Neurosci*. **24**, 8726-8740 (2004).
- 1136 12. D. Fischer, Z. He, L. I. Benowitz, Counteracting the Nogo receptor enhances optic nerve  
1137 regeneration if retinal ganglion cells are in an active growth state. *J Neurosci* **24**, 1646-  
1138 1651 (2004).
- 1139 13. T. L. Dickendesher *et al.*, NgR1 and NgR3 are receptors for chondroitin sulfate  
1140 proteoglycans. *Nat Neurosci* **15**, 703-712 (2012).
- 1141 14. K. K. Park *et al.*, Promoting axon regeneration in the adult CNS by modulation of the  
1142 PTEN/mTOR pathway. *Science* **322**, 963-966 (2008).
- 1143 15. T. Kurimoto *et al.*, Long-distance axon regeneration in the mature optic nerve:  
1144 contributions of oncomodulin, cAMP, and pten gene deletion. *J Neurosci* **30**, 15654-  
1145 15663 (2010).
- 1146 16. S. de Lima *et al.*, Full-length axon regeneration in the adult mouse optic nerve and  
1147 partial recovery of simple visual behaviors. *Proc Natl Acad Sci U S A* **109**, 9149-9154  
1148 (2012).
- 1149 17. F. Sun *et al.*, Sustained axon regeneration induced by co-deletion of PTEN and SOCS3.  
1150 *Nature*, (2012).
- 1151 18. N. Abe, V. Cavalli, Nerve injury signaling. *Curr Opin Neurobiol* **18**, 276-283 (2008).
- 1152 19. M. Mahar, V. Cavalli, Intrinsic mechanisms of neuronal axon regeneration. *Nat Rev*  
1153 *Neurosci* **19**, 323-337 (2018).
- 1154 20. V. Chandran *et al.*, A Systems-Level Analysis of the Peripheral Nerve Intrinsic Axonal  
1155 Growth Program. *Neuron* **89**, 956-970 (2016).
- 1156 21. F. M. Bareyre *et al.*, In vivo imaging reveals a phase-specific role of STAT3 during  
1157 central and peripheral nervous system axon regeneration. *Proc Natl Acad Sci U S A*  
1158 **108**, 6282-6287 (2011).
- 1159 22. D. L. Moore *et al.*, KLF family members regulate intrinsic axon regeneration ability.  
1160 *Science* **326**, 298-301 (2009).

- 1161 23. M. G. Blackmore *et al.*, Kruppel-like Factor 7 engineered for transcriptional activation  
1162 promotes axon regeneration in the adult corticospinal tract. *Proc Natl Acad Sci U S A*  
1163 **109**, 7517-7522 (2012).
- 1164 24. Z. Wang, A. Reynolds, A. Kirry, C. Nienhaus, M. G. Blackmore, Overexpression of  
1165 Sox11 promotes corticospinal tract regeneration after spinal injury while interfering with  
1166 functional recovery. *J Neurosci* **35**, 3139-3145 (2015).
- 1167 25. M. W. Norsworthy *et al.*, Sox11 Expression Promotes Regeneration of Some Retinal  
1168 Ganglion Cell Types but Kills Others. *Neuron* **94**, 1112-1120.e1114 (2017).
- 1169 26. M. M. Babu, N. M. Luscombe, L. Aravind, M. Gerstein, S. A. Teichmann, Structure and  
1170 evolution of transcriptional regulatory networks. *Curr Opin Struct Biol* **14**, 283-291  
1171 (2004).
- 1172 27. A. Blais, B. D. Dynlacht, Constructing transcriptional regulatory networks. *Genes Dev* **19**,  
1173 1499-1511 (2005).
- 1174 28. L. Ni *et al.*, Dynamic and complex transcription factor binding during an inducible  
1175 response in yeast. *Genes Dev* **23**, 1351-1363 (2009).
- 1176 29. G. May *et al.*, Dynamic analysis of gene expression and genome-wide transcription  
1177 factor binding during lineage specification of multipotent progenitors. *Cell Stem Cell* **13**,  
1178 754-768 (2013).
- 1179 30. M. B. Gerstein *et al.*, Architecture of the human regulatory network derived from  
1180 ENCODE data. *Nature* **489**, 91 (2012).
- 1181 31. N. D. Fagoe, J. van Heest, J. Verhaagen, Spinal cord injury and the neuron-intrinsic  
1182 regeneration-associated gene program. *Neuromolecular medicine* **16**, 799-813 (2014).
- 1183 32. J. Kim, J. Chu, X. Shen, J. Wang, S. H. Orkin, An extended transcriptional network for  
1184 pluripotency of embryonic stem cells. *Cell* **132**, 1049-1061 (2008).
- 1185 33. R. Jothi *et al.*, Genomic analysis reveals a tight link between transcription factor  
1186 dynamics and regulatory network architecture. *Mol Syst Biol* **5**, 294 (2009).
- 1187 34. A. P. Boyle *et al.*, Comparative analysis of regulatory information and circuits across  
1188 distant species. *Nature* **512**, 453-456 (2014).
- 1189 35. H. Yu, M. Gerstein, Genomic analysis of the hierarchical structure of regulatory  
1190 networks. (2006).
- 1191 36. A. Blesch *et al.*, Conditioning lesions before or after spinal cord injury recruit broad  
1192 genetic mechanisms that sustain axonal regeneration: superiority to camp-mediated  
1193 effects. *Experimental neurology* **235**, 162-173 (2012).
- 1194 37. R. S. Griffin *et al.*, Complement induction in spinal cord microglia results in  
1195 anaphylatoxin C5a-mediated pain hypersensitivity. *J Neurosci* **27**, 8699-8708 (2007).
- 1196 38. B. Yu *et al.*, miR-182 inhibits Schwann cell proliferation and migration by targeting FGF9  
1197 and NTM, respectively at an early stage following sciatic nerve injury. *Nucleic Acids Res*  
1198 **40**, 10356-10365 (2012).
- 1199 39. I. Michaelevski *et al.*, Signaling to transcription networks in the neuronal retrograde injury  
1200 response. *Sci Signal* **3**, ra53 (2010).
- 1201 40. J. Ryge *et al.*, in *BMC Genomics*. (2010), vol. 11, pp. 365.
- 1202 41. A. De Biase *et al.*, Gene expression profiling of experimental traumatic spinal cord injury  
1203 as a function of distance from impact site and injury severity. *Physiol Genomics* **22**, 368-  
1204 381 (2005).
- 1205 42. J. A. Chong *et al.*, REST: a mammalian silencer protein that restricts sodium channel  
1206 gene expression to neurons. *Cell* **80**, 949-957 (1995).
- 1207 43. C. J. Schoenherr, D. J. Anderson, The neuron-restrictive silencer factor (NRSF): a  
1208 coordinate repressor of multiple neuron-specific genes. *Science* **267**, 1360-1363 (1995).
- 1209 44. N. Ballas, C. Grunseich, D. D. Lu, J. C. Speh, G. Mandel, REST and its corepressors  
1210 mediate plasticity of neuronal gene chromatin throughout neurogenesis. *Cell* **121**, 645-  
1211 657 (2005).

- 1212 45. N. Ballas, G. Mandel, The many faces of REST oversee epigenetic programming of  
1213 neuronal genes. *Curr Opin Neurobiol* **15**, 500-506 (2005).
- 1214 46. T. Nechiporuk *et al.*, The REST remodeling complex protects genomic integrity during  
1215 embryonic neurogenesis. *Elife* **5**, e09584 (2016).
- 1216 47. J. C. McGann *et al.*, Polycomb- and REST-associated histone deacetylases are  
1217 independent pathways toward a mature neuronal phenotype. *Elife* **3**, e04235 (2014).
- 1218 48. A. A. Margolin *et al.*, in *BMC Bioinformatics*. (2006), vol. 7, pp. S7.
- 1219 49. A. Lachmann, F. M. Giorgi, G. Lopez, A. Califano, ARACNe-AP: gene network reverse  
1220 engineering through adaptive partitioning inference of mutual information. *Bioinformatics*  
1221 **32**, 2233-2235 (2016).
- 1222 50. X. Zhao *et al.*, The N-Myc-DLL3 cascade is suppressed by the ubiquitin ligase Huwe1 to  
1223 inhibit proliferation and promote neurogenesis in the developing brain. *Dev Cell* **17**, 210-  
1224 221 (2009).
- 1225 51. M. S. Carro *et al.*, The transcriptional network for mesenchymal transformation of brain  
1226 tumours. *Nature* **463**, 318-325 (2010).
- 1227 52. C. Lefebvre *et al.*, A human B-cell interactome identifies MYB and FOXM1 as master  
1228 regulators of proliferation in germinal centers. *Mol Syst Biol* **6**, 377 (2010).
- 1229 53. G. Della Gatta *et al.*, Reverse engineering of TLX oncogenic transcriptional networks  
1230 identifies RUNX1 as tumor suppressor in T-ALL. *Nature medicine* **18**, 436-440 (2012).
- 1231 54. R. Kushwaha *et al.*, Interrogation of a Context-Specific Transcription Factor Network  
1232 Identifies Novel Regulators of Pluripotency. *Stem Cells* **33**, 367-377 (2015).
- 1233 55. A. Lachmann *et al.*, ChEA: transcription factor regulation inferred from integrating  
1234 genome-wide ChIP-X experiments. *Bioinformatics* **26**, 2438-2444 (2010).
- 1235 56. S. G. Landt *et al.*, ChIP-seq guidelines and practices of the ENCODE and modENCODE  
1236 consortia. *Genome Res* **22**, 1813-1831 (2012).
- 1237 57. H. Tsujino *et al.*, Activating transcription factor 3 (ATF3) induction by axotomy in sensory  
1238 and motoneurons: A novel neuronal marker of nerve injury. *Mol Cell Neurosci* **15**, 170-  
1239 182 (2000).
- 1240 58. R. Seiffers, C. D. Mills, C. J. Woolf, in *J Neurosci*. (2007), vol. 27, pp. 7911-7920.
- 1241 59. R. Jenkins, S. P. Hunt, Long-term increase in the levels of c-jun mRNA and jun protein-  
1242 like immunoreactivity in motor and sensory neurons following axon damage. *Neurosci*  
1243 *Lett* **129**, 107-110 (1991).
- 1244 60. F. W. Schwaiger *et al.*, Peripheral but not central axotomy induces changes in Janus  
1245 kinases (JAK) and signal transducers and activators of transcription (STAT). *Eur J*  
1246 *Neurosci* **12**, 1165-1176 (2000).
- 1247 61. G. Raivich *et al.*, The AP-1 transcription factor c-Jun is required for efficient axonal  
1248 regeneration. *Neuron* **43**, 57-67 (2004).
- 1249 62. H. Zou, C. Ho, K. Wong, M. Tessier-Lavigne, Axotomy-induced Smad1 activation  
1250 promotes axonal growth in adult sensory neurons. *J Neurosci* **29**, 7116-7123 (2009).
- 1251 63. Saijilafu *et al.*, PI3K-GSK3 signalling regulates mammalian axon regeneration by  
1252 inducing the expression of Smad1. *Nat Commun* **4**, 2690 (2013).
- 1253 64. M. P. Jankowski, P. K. Cornuet, S. McIlwrath, H. R. Koerber, K. M. Albers, SRY-box  
1254 containing gene 11 (Sox11) transcription factor is required for neuron survival and  
1255 neurite growth. *Neuroscience* **143**, 501-514 (2006).
- 1256 65. X. Jing, T. Wang, S. Huang, J. C. Glorioso, K. M. Albers, The transcription factor Sox11  
1257 promotes nerve regeneration through activation of the regeneration-associated gene  
1258 *Sprr1a*. *Experimental neurology* **233**, 221-232 (2012).
- 1259 66. W. Renthal *et al.*, Transcriptional Reprogramming of Distinct Peripheral Sensory Neuron  
1260 Subtypes after Axonal Injury. *Neuron*, (2020).
- 1261 67. R. Deumens, G. C. Koopmans, E. A. Joosten, Regeneration of descending axon tracts  
1262 after spinal cord injury. *Prog Neurobiol* **77**, 57-89 (2005).



- 1263 68. M. V. Sofroniew, Dissecting spinal cord regeneration. *Nature* **557**, 343 (2018).
- 1264 69. D. H. Geschwind, G. Konopka, Neuroscience in the era of functional genomics and  
1265 systems biology. *Nature* **461**, 908-915 (2009).
- 1266 70. A. Tedeschi, Tuning the Orchestra: Transcriptional Pathways Controlling Axon  
1267 Regeneration. *Frontiers in molecular neuroscience* **4**, (2011).
- 1268 71. L. Aigner *et al.*, Overexpression of the neural growth-associated protein GAP-43 induces  
1269 nerve sprouting in the adult nervous system of transgenic mice. *Cell* **83**, 269-278 (1995).
- 1270 72. H. M. Bomze, K. R. Bulsara, B. J. Iskandar, P. Caroni, J. H. Skene, Spinal axon  
1271 regeneration evoked by replacing two growth cone proteins in adult neurons. *Nature*  
1272 *neuroscience* **4**, 38-43 (2001).
- 1273 73. G. Keilhoff, S. Wiegand, H. Fansa, Vav deficiency impedes peripheral nerve  
1274 regeneration in mice. *Restor Neurol Neurosci* **30**, 463-479 (2012).
- 1275 74. L. F. Gumy *et al.*, Transcriptome analysis of embryonic and adult sensory axons reveals  
1276 changes in mRNA repertoire localization. *RNA* **17**, 85-98 (2011).
- 1277 75. N. Kishimoto, K. Shimizu, K. Sawamoto, in *Dis Model Mech.* (2012), vol. 5, pp. 200-209.
- 1278 76. A. Guijarro-Belmar *et al.*, Epac2 Elevation Reverses Inhibition by Chondroitin Sulfate  
1279 Proteoglycans In Vitro and Transforms Postlesion Inhibitory Environment to Promote  
1280 Axonal Outgrowth in an Ex Vivo Model of Spinal Cord Injury. *J Neurosci* **39**, 8330-8346  
1281 (2019).
- 1282 77. N. Kato *et al.*, in *Journal of neuroinflammation.* (2013), vol. 10, pp. 1.
- 1283 78. A. W. Bruce *et al.*, Genome-wide analysis of repressor element 1 silencing transcription  
1284 factor/neuron-restrictive silencing factor (REST/NRSF) target genes. *Proc Natl Acad Sci*  
1285 *U S A* **101**, 10458-10463 (2004).
- 1286 79. R. Johnson *et al.*, in *PLoS Biol.* (2008), vol. 6.
- 1287 80. V. Matys *et al.*, TRANSFAC: transcriptional regulation, from patterns to profiles. *Nucleic*  
1288 *Acids Res* **31**, 374-378 (2003).
- 1289 81. S. Mukherjee, R. Brulet, L. Zhang, J. Hsieh, REST regulation of gene networks in adult  
1290 neural stem cells. *Nat Commun* **7**, 13360 (2016).
- 1291 82. P. Langfelder, S. Horvath, in *BMC Bioinformatics.* (2008), vol. 9, pp. 559.
- 1292 83. B. Zhang, S. Horvath, A general framework for weighted gene co-expression network  
1293 analysis. *Stat Appl Genet Mol Biol* **4**, Article17 (2005).
- 1294 84. A. J. Aguayo *et al.*, Degenerative and regenerative responses of injured neurons in the  
1295 central nervous system of adult mammals. *Philos Trans R Soc Lond B Biol Sci* **331**, 337-  
1296 343 (1991).
- 1297 85. T. Kurimoto *et al.*, Neutrophils express oncomodulin and promote optic nerve  
1298 regeneration. *J Neurosci* **33**, 14816-14824 (2013).
- 1299 86. Y. Yin *et al.*, Oncomodulin links inflammation to optic nerve regeneration. *Proc Natl Acad*  
1300 *Sci U S A* **106**, 19587-19592 (2009).
- 1301 87. Y. Yin *et al.*, Oncomodulin is a macrophage-derived signal for axon regeneration in  
1302 retinal ganglion cells. *Nat Neurosci* **9**, 843-852 (2006).
- 1303 88. Y. Yin *et al.*, Stromal cell-derived factor-1 (SDF-1) contributes to inflammation-induced  
1304 optic nerve regeneration and retinal ganglion cell survival. **Program No. 531.04. 2012**  
1305 **Neuroscience Meeting Planner. New Orleans, LA: Society for Neuroscience, 2012,**  
1306 **Online.**, (2012).
- 1307 89. V. Pernet *et al.*, Long-distance axonal regeneration induced by CNTF gene transfer is  
1308 impaired by axonal misguidance in the injured adult optic nerve. *Neurobiology of disease*  
1309 **51**, 202-213 (2013).
- 1310 90. A. Apará *et al.*, KLF9 and JNK3 Interact to Suppress Axon Regeneration in the Adult  
1311 CNS. *J Neurosci* **37**, 9632-9644 (2017).
- 1312 91. E. F. Trakhtenberg *et al.*, Zinc chelation and Klf9 knockdown cooperatively promote  
1313 axon regeneration after optic nerve injury. *Exp Neurol* **300**, 22-29 (2018).

- 1314 92. Y. Li *et al.*, Mobile zinc increases rapidly in the retina after optic nerve injury and  
1315 regulates ganglion cell survival and optic nerve regeneration. *Proc Natl Acad Sci U S A*  
1316 **114**, E209-E218 (2017).
- 1317 93. J. H. Lim *et al.*, Neural activity promotes long-distance, target-specific regeneration of  
1318 adult retinal axons. *Nat Neurosci* **19**, 1073-1084 (2016).
- 1319 94. L. I. Benowitz, Z. He, J. L. Goldberg, Reaching the brain: Advances in optic nerve  
1320 regeneration. *Experimental neurology* **287**, 365-373 (2017).
- 1321 95. Y. Zhang *et al.*, Elevating Growth Factor Responsiveness and Axon Regeneration by  
1322 Modulating Presynaptic Inputs. *Neuron*, (2019).
- 1323 96. G. Feng *et al.*, Imaging neuronal subsets in transgenic mice expressing multiple spectral  
1324 variants of GFP. *Neuron* **28**, 41-51 (2000).
- 1325 97. M. A. Stavarache, S. Musatov, M. McGill, M. Vernov, M. G. Kaplitt, The tumor  
1326 suppressor PTEN regulates motor responses to striatal dopamine in normal and  
1327 Parkinsonian animals. *Neurobiology of disease* **82**, 487-494 (2015).
- 1328 98. A. Subramanian *et al.*, Gene set enrichment analysis: a knowledge-based approach for  
1329 interpreting genome-wide expression profiles. *Proc Natl Acad Sci U S A* **102**, 15545-  
1330 15550 (2005).
- 1331 99. I. Yevshin, R. Sharipov, S. Kolmykov, Y. Kondrakhin, F. Kolpakov, in *Nucleic Acids Res.*  
1332 (2019), vol. 47, pp. D100-105.
- 1333 100. J. F. Borisoff *et al.*, Suppression of Rho-kinase activity promotes axonal growth on  
1334 inhibitory CNS substrates. *Mol Cell Neurosci* **22**, 405-416 (2003).
- 1335 101. Z. L. Chen, S. Strickland, Laminin gamma1 is critical for Schwann cell differentiation,  
1336 axon myelination, and regeneration in the peripheral nerve. *The Journal of cell biology*  
1337 **163**, 889-899 (2003).
- 1338 102. C. L. Tan, J. C. F. Kwok, R. Patani, S. Chandran, J. W. Fawcett, Integrin activation  
1339 promotes axon growth on inhibitory CSPGs by enhancing integrin signaling. *J Neurosci*  
1340 **31**, 6289-6295 (2011).
- 1341 103. B. Lang *et al.*, Modulation of the proteoglycan receptor PTP $\sigma$  promotes recovery after  
1342 spinal cord injury. *Nature* **518**, 404-408 (2015).
- 1343 104. V. Lisi *et al.*, Enhanced Neuronal Regeneration in the CAST/Ei Mouse Strain Is Linked to  
1344 Expression of Differentiation Markers after Injury. *Cell Rep* **20**, 1136-1147 (2017).
- 1345 105. D. S. Smith, J. H. Skene, A transcription-dependent switch controls competence of adult  
1346 neurons for distinct modes of axon growth. *J Neurosci* **17**, 646-658 (1997).
- 1347 106. Saijilafu, F. Q. Zhou, Genetic study of axon regeneration with cultured adult dorsal root  
1348 ganglion neurons. *J Vis Exp*, (2012).
- 1349 107. Z. Gao *et al.*, in *J Neurosci.* (2011), vol. 31, pp. 9772-9786.
- 1350 108. K. Liu *et al.*, PTEN deletion enhances the regenerative ability of adult corticospinal  
1351 neurons. *Nature neuroscience* **13**, 1075-1081 (2010).
- 1352 109. M. A. Anderson *et al.*, Astrocyte scar formation aids central nervous system axon  
1353 regeneration. *Nature* **532**, 195 (2016).
- 1354 110. C. G. Geoffroy, B. Zheng, Myelin-Associated Inhibitors in Axonal Growth After CNS  
1355 Injury. *Curr Opin Neurobiol* **0**, 31-38 (2014).
- 1356 111. G. Mandel *et al.*, Repressor element 1 silencing transcription factor (REST) controls  
1357 radial migration and temporal neuronal specification during neocortical development.  
1358 *Proc Natl Acad Sci U S A* **108**, 16789-16794 (2011).
- 1359 112. Y. Yin *et al.*, Macrophage-derived factors stimulate optic nerve regeneration. *Journal of*  
1360 *Neuroscience* **23**, 2284-2293 (2003).
- 1361 113. M. P. Jankowski *et al.*, Sox11 transcription factor modulates peripheral nerve  
1362 regeneration in adult mice. *Brain Res* **1256**, 43-54 (2009).
- 1363 114. S. T. Mehta, X. Luo, K. K. Park, J. L. Bixby, V. P. Lemmon, Hyperactivated Stat3 boosts  
1364 axon regeneration in the CNS. *Experimental neurology* **280**, 115-120 (2016).

- 1365 115. C. Lindwall, M. Kanje, Retrograde axonal transport of JNK signaling molecules influence  
1366 injury induced nuclear changes in p-c-Jun and ATF3 in adult rat sensory neurons. *Mol*  
1367 *Cell Neurosci* **29**, 269-282 (2005).
- 1368 116. J. Qiu, W. B. Cafferty, S. B. McMahon, S. W. Thompson, Conditioning injury-induced  
1369 spinal axon regeneration requires signal transducer and activator of transcription 3  
1370 activation. *J Neurosci* **25**, 1645-1653 (2005).
- 1371 117. P. D. Smith *et al.*, SOCS3 deletion promotes optic nerve regeneration in vivo. *Neuron*  
1372 **64**, 617-623 (2009).
- 1373 118. C. J. Schoenherr, A. J. Paquette, D. J. Anderson, Identification of potential target genes  
1374 for the neuron-restrictive silencer factor. *Proc Natl Acad Sci U S A* **93**, 9881-9886  
1375 (1996).
- 1376 119. C. Conaco, S. Otto, J. J. Han, G. Mandel, Reciprocal actions of REST and a microRNA  
1377 promote neuronal identity. *Proc Natl Acad Sci U S A* **103**, 2422-2427 (2006).
- 1378 120. S. J. Otto *et al.*, A new binding motif for the transcriptional repressor REST uncovers  
1379 large gene networks devoted to neuronal functions. *J Neurosci* **27**, 6729-6739 (2007).
- 1380 121. A. Calderone *et al.*, Ischemic insults derepress the gene silencer REST in neurons  
1381 destined to die. *J Neurosci* **23**, 2112-2121 (2003).
- 1382 122. K. M. Noh *et al.*, Repressor element-1 silencing transcription factor (REST)-dependent  
1383 epigenetic remodeling is critical to ischemia-induced neuronal death. *Proc Natl Acad Sci*  
1384 *U S A* **109**, E962-971 (2012).
- 1385 123. K. Palm, N. Belluardo, M. Metsis, T. Timmusk, Neuronal expression of zinc finger  
1386 transcription factor REST/NRSF/XBR gene. *J Neurosci* **18**, 1280-1296 (1998).
- 1387 124. M. Garriga-Canut *et al.*, 2-Deoxy-D-glucose reduces epilepsy progression by NRSF-  
1388 CtBP-dependent metabolic regulation of chromatin structure. *Nature neuroscience* **9**,  
1389 1382-1387 (2006).
- 1390 125. S. McClelland *et al.*, Neuron-restrictive silencer factor-mediated hyperpolarization-  
1391 activated cyclic nucleotide gated channelopathy in experimental temporal lobe epilepsy.  
1392 *Ann Neurol* **70**, 454-464 (2011).
- 1393 126. S. McClelland *et al.*, The transcription factor NRSF contributes to epileptogenesis by  
1394 selective repression of a subset of target genes. *Elife* **3**, e01267 (2014).
- 1395 127. C. Zuccato *et al.*, Huntingtin interacts with REST/NRSF to modulate the transcription of  
1396 NRSE-controlled neuronal genes. *Nat Genet* **35**, 76-83 (2003).
- 1397 128. T. Lu *et al.*, REST and stress resistance in ageing and Alzheimer's disease. *Nature* **507**,  
1398 448-454 (2014).
- 1399 129. J. M. Zullo *et al.*, Regulation of lifespan by neural excitation and REST. *Nature* **574**, 359-  
1400 364 (2019).
- 1401 130. H. Uchida, L. Ma, H. Ueda, Epigenetic gene silencing underlies C-fiber dysfunctions in  
1402 neuropathic pain. *J Neurosci* **30**, 4806-4814 (2010).
- 1403 131. D. E. Willis, M. Wang, E. Brown, L. Fones, J. W. Cave, Selective repression of gene  
1404 expression in neuropathic pain by the neuron-restrictive silencing factor/repressor  
1405 element-1 silencing transcription (NRSF/REST). *Neurosci Lett* **625**, 20-25 (2016).
- 1406 132. J. Zhang, S. R. Chen, H. Chen, H. L. Pan, RE1-silencing transcription factor controls the  
1407 acute-to-chronic neuropathic pain transition and Chrm2 receptor gene expression in  
1408 primary sensory neurons. *J Biol Chem* **293**, 19078-19091 (2018).
- 1409 133. Y. M. Oh *et al.*, Epigenetic regulator UHRF1 inactivates REST and growth suppressor  
1410 gene expression via DNA methylation to promote axon regeneration. (2018).
- 1411 134. M. H. Tuszynski, O. Steward, Concepts and Methods for the Study of Axonal  
1412 Regeneration in the CNS. *Neuron* **74**, 777-791 (2012).
- 1413 135. M. B. Bunge, Bridging areas of injury in the spinal cord. *Neuroscientist* **7**, 325-339  
1414 (2001).

- 1415 136. H. Cheng, Y. Cao, L. Olson, Spinal cord repair in adult paraplegic rats: partial restoration  
1416 of hind limb function. *Science* **273**, 510-513 (1996).
- 1417 137. P. Lu *et al.*, Long-distance growth and connectivity of neural stem cells after severe  
1418 spinal cord injury. *Cell* **150**, 1264-1273 (2012).
- 1419 138. K. Kadoya *et al.*, Spinal cord reconstitution with homologous neural grafts enables  
1420 robust corticospinal regeneration. *Nature medicine* **22**, 479-487 (2016).
- 1421 139. e. a. Liu K PTEN deletion enhances the regenerative ability of adult corticospinal  
1422 neurons. - PubMed - NCBI. (2017).
- 1423 140. J. C. Koch, E. Barski, P. Lingor, M. Bahr, U. Michel, Plasmids containing NRSE/RE1  
1424 sites enhance neurite outgrowth of retinal ganglion cells via sequestration of REST  
1425 independent of NRSE dsRNA expression. *FEBS J* **278**, 3472-3483 (2011).
- 1426 141. C. Kole *et al.*, Activating Transcription Factor 3 (ATF3) Protects Retinal Ganglion Cells  
1427 and Promotes Functional Preservation After Optic Nerve Crush. *Invest Ophthalmol Vis*  
1428 *Sci* **61**, 31 (2020).
- 1429 142. A. Brunet, S. R. Datta, M. E. Greenberg, Transcription-dependent and -independent  
1430 control of neuronal survival by the PI3K-Akt signaling pathway. *Curr Opin Neurobiol* **11**,  
1431 297-305 (2001).
- 1432 143. T. Gu *et al.*, CREB is a novel nuclear target of PTEN phosphatase. *Cancer Res* **71**,  
1433 2821-2825 (2011).
- 1434 144. K. Du, M. Montminy, CREB is a regulatory target for the protein kinase Akt/PKB. *J Biol*  
1435 *Chem* **273**, 32377-32379 (1998).
- 1436 145. J. Satoh, N. Kawana, Y. Yamamoto, in *Bioinform Biol Insights*. (2013), vol. 7, pp. 357-  
1437 368.
- 1438 146. Y. Nakano *et al.*, Defects in the Alternative Splicing-Dependent Regulation of REST  
1439 Cause Deafness. *Cell* **174**, 536-548.e521 (2018).
- 1440 147. T. F. Westbrook *et al.*, SCFbeta-TRCP controls oncogenic transformation and neural  
1441 differentiation through REST degradation. *Nature* **452**, 370-374 (2008).
- 1442 148. M. Faronato *et al.*, The deubiquitylase USP15 stabilizes newly synthesized REST and  
1443 rescues its expression at mitotic exit. *Cell Cycle* **12**, 1964-1977 (2013).
- 1444 149. K. Zukor *et al.*, Short hairpin RNA against PTEN enhances regenerative growth of  
1445 corticospinal tract axons after spinal cord injury. *J Neurosci* **33**, 15350-15361 (2013).
- 1446 150. S. Leon, Y. Yin, J. Nguyen, N. Irwin, L. I. Benowitz, Lens injury stimulates axon  
1447 regeneration in the mature rat optic nerve. *J Neurosci* **20**, 4615-4626 (2000).
- 1448 151. V. Swarup *et al.*, Identification of evolutionarily conserved gene networks mediating  
1449 neurodegenerative dementia. *Nature medicine* **25**, 152-164 (2019).
- 1450 152. M. A. Castro *et al.*, Regulators of genetic risk of breast cancer identified by integrative  
1451 network analysis. *Nat Genet* **48**, 12-21 (2016).
- 1452 153. A. Dobin *et al.*, STAR: ultrafast universal RNA-seq aligner. *Bioinformatics* **29**, 15-21  
1453 (2013).
- 1454 154. R. Patro, G. Duggal, M. I. Love, R. A. Irizarry, C. Kingsford, Salmon: fast and bias-aware  
1455 quantification of transcript expression using dual-phase inference. *Nature methods* **14**,  
1456 417-419 (2017).
- 1457 155. C. Sonesson, M. I. Love, M. D. Robinson, Differential analyses for RNA-seq: transcript-  
1458 level estimates improve gene-level inferences. *F1000Res* **4**, 1521 (2015).
- 1459 156. M. I. Love, W. Huber, S. Anders, in *Genome Biol.* (2014), vol. 15.
- 1460 157. D. Risso, J. Ngai, T. P. Speed, S. Dudoit, Normalization of RNA-seq data using factor  
1461 analysis of control genes or samples. *Nature biotechnology* **32**, 896-902 (2014).
- 1462 158. M. E. Ritchie *et al.*, limma powers differential expression analyses for RNA-sequencing  
1463 and microarray studies. *Nucleic Acids Res* **43**, e47 (2015).
- 1464 159. J. Reimand *et al.*, g:Profiler—a web server for functional interpretation of gene lists  
1465 (2016 update). *Nucleic Acids Res* **44**, W83-89 (2016).

- 1466 160. G. Yu, L. G. Wang, Y. Han, Q. Y. He, clusterProfiler: an R package for comparing  
1467 biological themes among gene clusters. *OMICS* **16**, 284-287 (2012).  
1468 161. A. Lundby *et al.*, Annotation of loci from genome-wide association studies using tissue-  
1469 specific quantitative interaction proteomics. *Nature methods* **11**, 868-874 (2014).  
1470 162. E. J. Rossin *et al.*, in *PLoS Genet.* (2011), vol. 7.  
1471



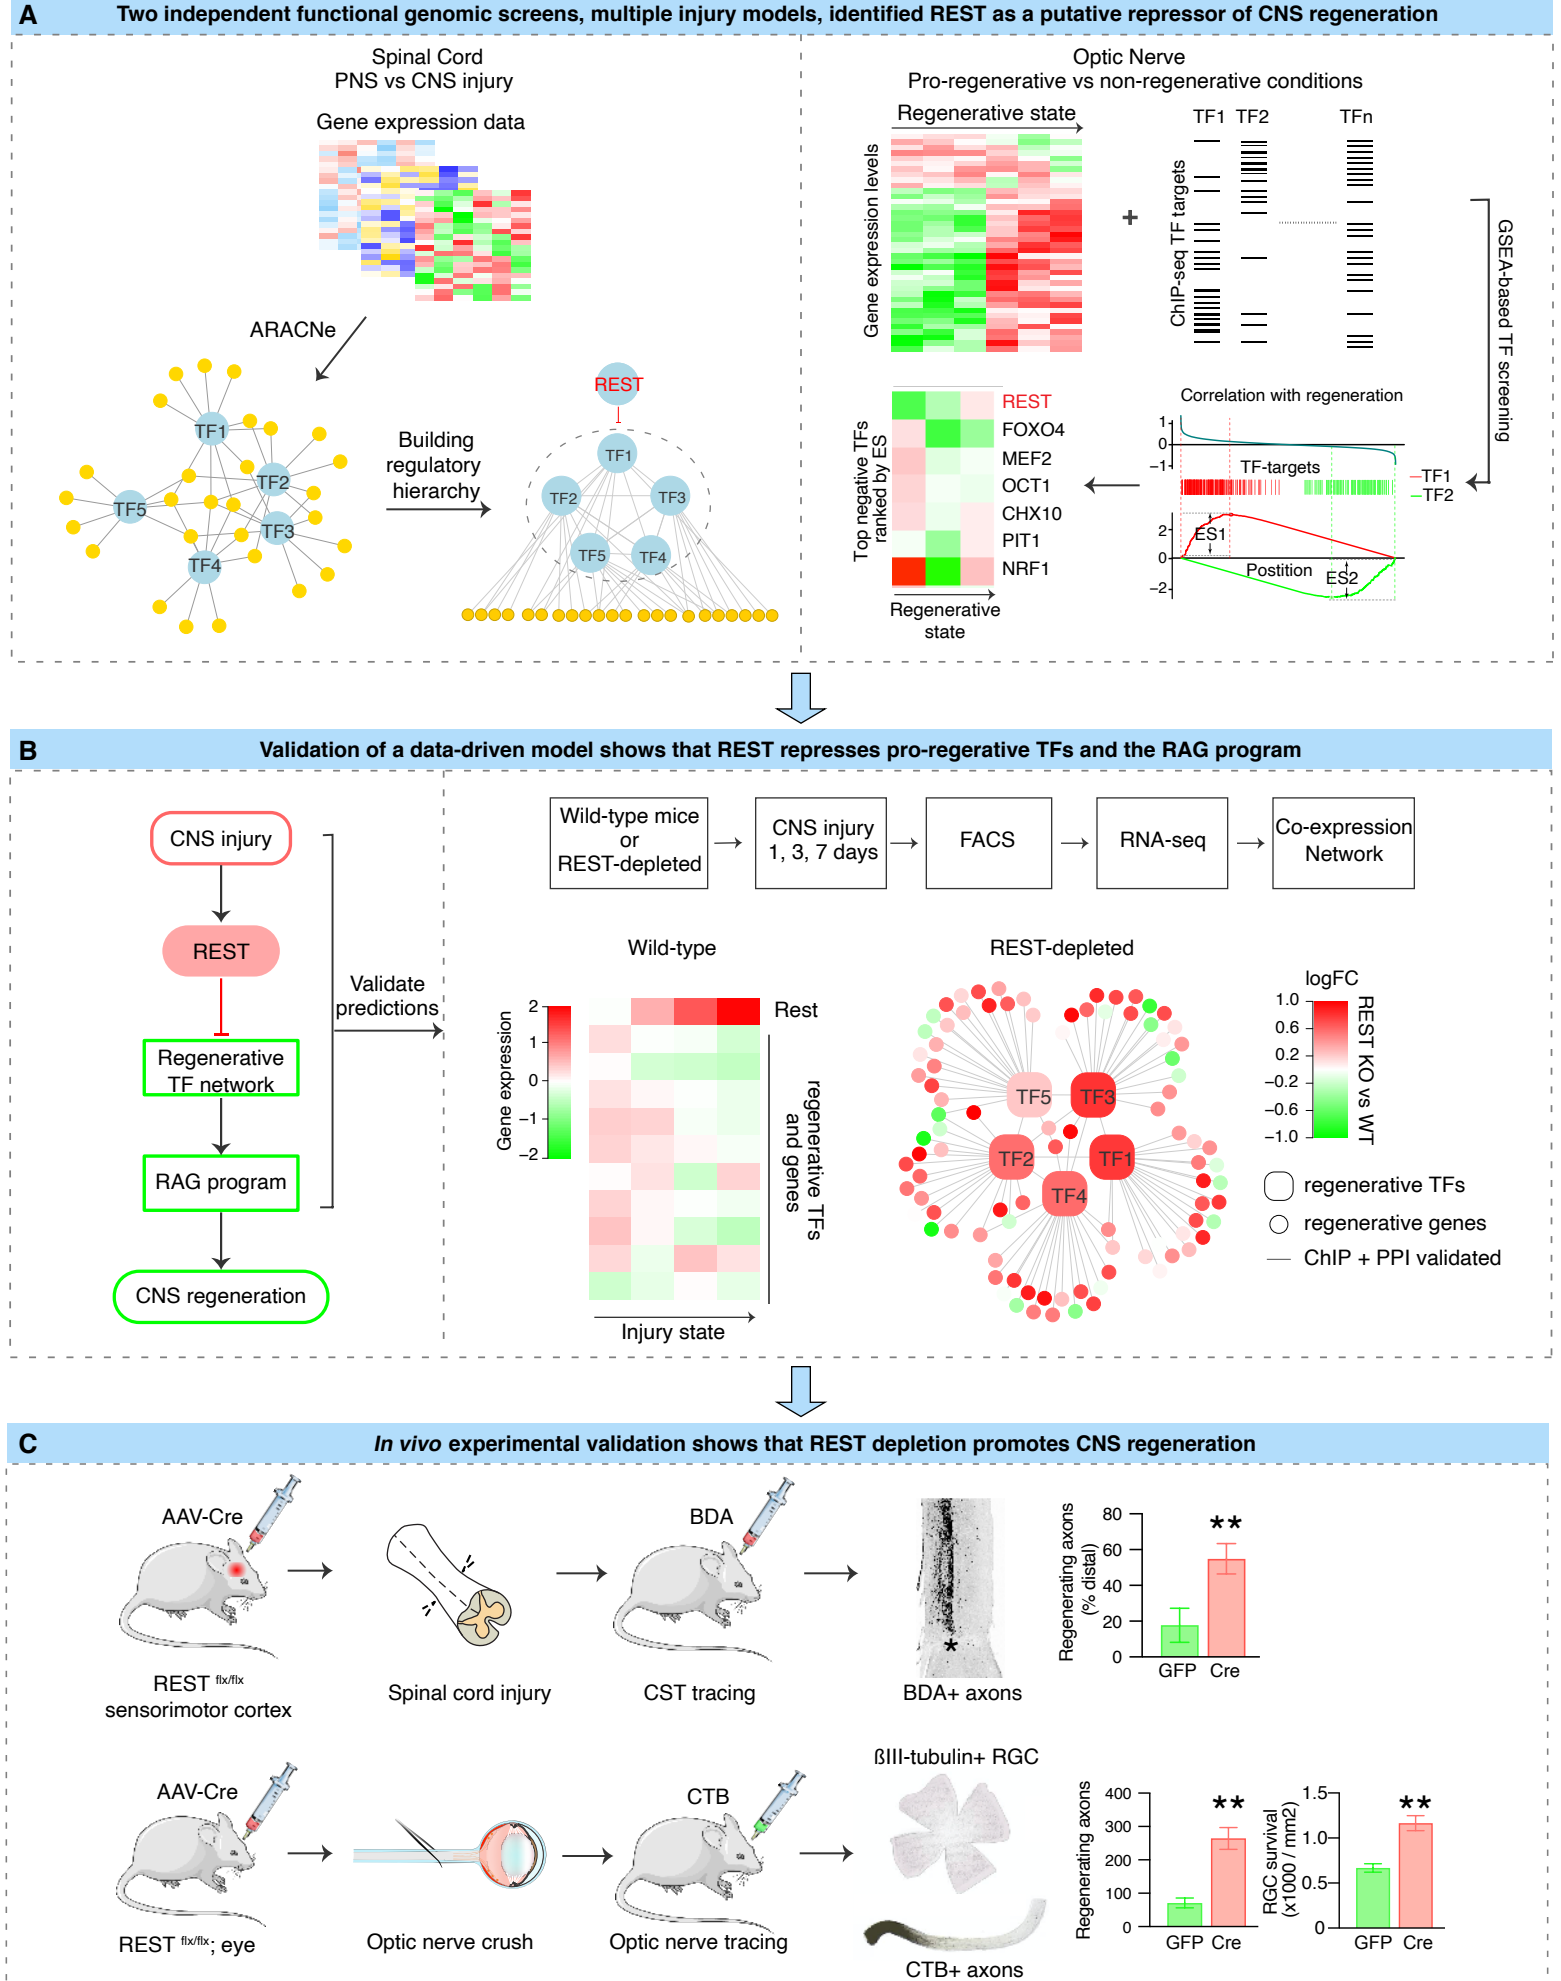



**Figure 1. Schematic diagram summarizing the overall experimental flow integrating iterative bio-informatics and experimental validation.** Multiple independent functional genomics analyses of distinct injury models were analyzed to computationally identify upstream TFs associated with CNS regeneration. In the first set of analysis (**A**, left), we performed a mutual information-based network analysis using ARACNe to characterize the transcriptional regulatory network formed by regeneration-associated TFs in multiple independent data sets from spinal cord and peripheral nerve injury. The hierarchical structure of the TF regulatory network was further characterized, so as to identify potential upstream regulators. This step-wise analysis predicted REST, a transcriptional repressor, as an upstream negative regulator inhibiting the core pro-regenerative TFs to drive the expression of regeneration-associated genes (RAGs). In parallel (**A**, right), we performed an additional unbiased genome-wide screen in another CNS tissue, optic nerve, under pro-growth and native conditions to identify TF regulators of regeneration. Among the ~1000 TF-target gene sets unbiasedly tested via Gene Set Enrichment Analysis, REST was ranked as the top negative regulator of the RGC regeneration state-associated gene set. Multiple independent bio-informatic analyses of external data sets confirmed and converged on our model (**B**), by which REST is activated by CNS injury and acts as a potential upstream negative regulator of the core regenerative TFs. To test this, we performed gene expression analysis in the injured CNS with REST and after REST depletion, showing REST increases following CNS injury, while the core pro-regenerative TFs and genes remain suppressed. Depleting REST activates a core molecular program driven by a tightly controlled TF network similar to the one activated during regeneration. These results predicted that REST depletion would improve regeneration, which we directly tested in two different, well-established models of regeneration *in vivo* (**C**), confirming REST's functional effect as a suppressor of regeneration. In the case of optic nerve injury, REST depletion or inhibition enhanced both RGC regeneration and survival. These analyses identify a novel role for REST as an upstream suppressor of the intrinsic regenerative program in the CNS and demonstrate the power of a systems biology approach involving integrative genomics and bio-informatics to predict key regulators of CNS repair.

**A**

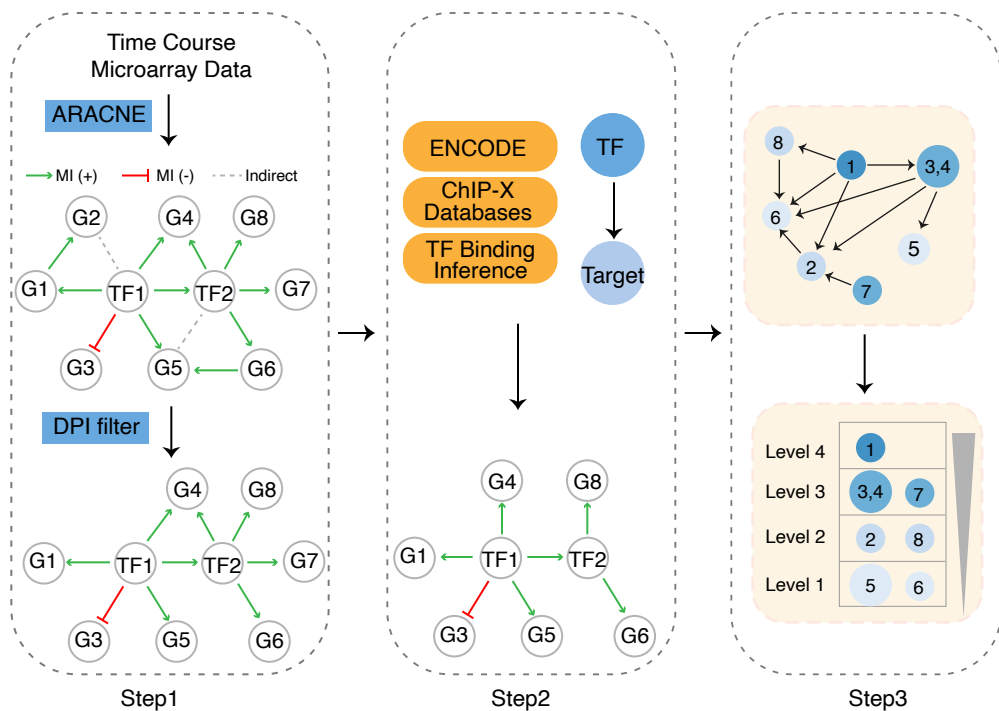

**B**

|     | Dataset | Injury type                | Time points                                                      |
|-----|---------|----------------------------|------------------------------------------------------------------|
| PNS | PNS1    | Michaevlevski et al., 2010 | Sciatic nerve crush<br>0, 1, 3, 8, 12, 16, 18, 24, 28hrs         |
|     | PNS2    | Blesch et al., 2012        | Sciatic nerve crush<br>0, 1, 3, 7, 14, 49 days                   |
|     | PNS3a   | Griffin et al., 2007       | Spared nerve ligation<br>0, 3, 7, 21, 40 hrs                     |
|     | PNS3b   | Griffin et al., 2007       | Spinal nerve ligation<br>0, 3, 7, 21, 40 hrs                     |
|     | PNS4    | Griffin et al., 2007       | Chronic nerve constriction<br>0, 3, 7, 21, 40 hrs                |
| CNS | PNS5    | Yu et al., 2012            | Sciatic nerve crush<br>0h, 0.5h, 1h, 3h, 6h, 9h, 1d, 4d, 7d, 14d |
|     | CNS1    | Ryge et al., 2010          | Spinal cord transection<br>0, 2, 7, 21, 60 days                  |
|     | CNS2    | Blesch et al., 2013        | C3 dorsal column lesion<br>0, 1, 3, 7, 14, 49 days               |
|     | CNS3    | Biase et al., 2005         | Spinal cord injury<br>0, 0.5, 4, 12, 24, 48, 72, 168hrs          |

**C**

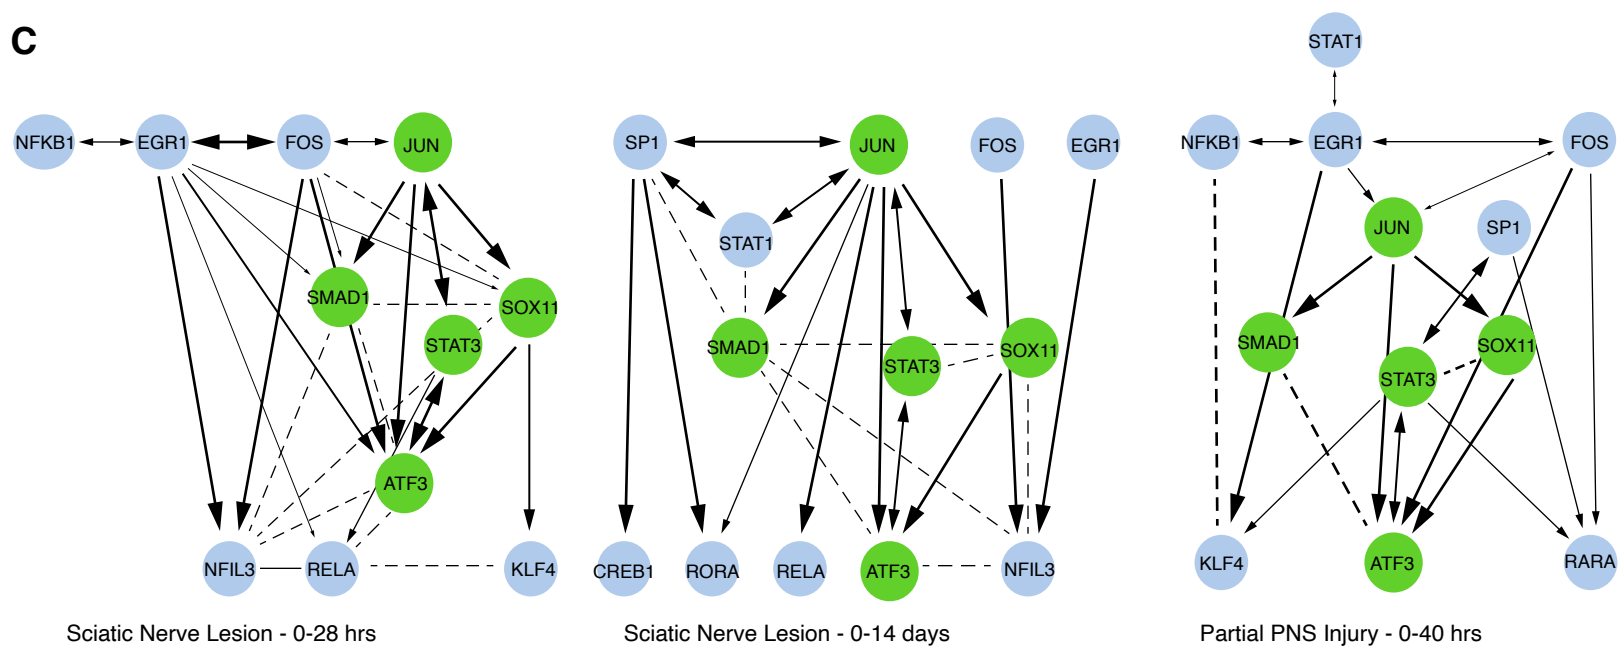

**D**

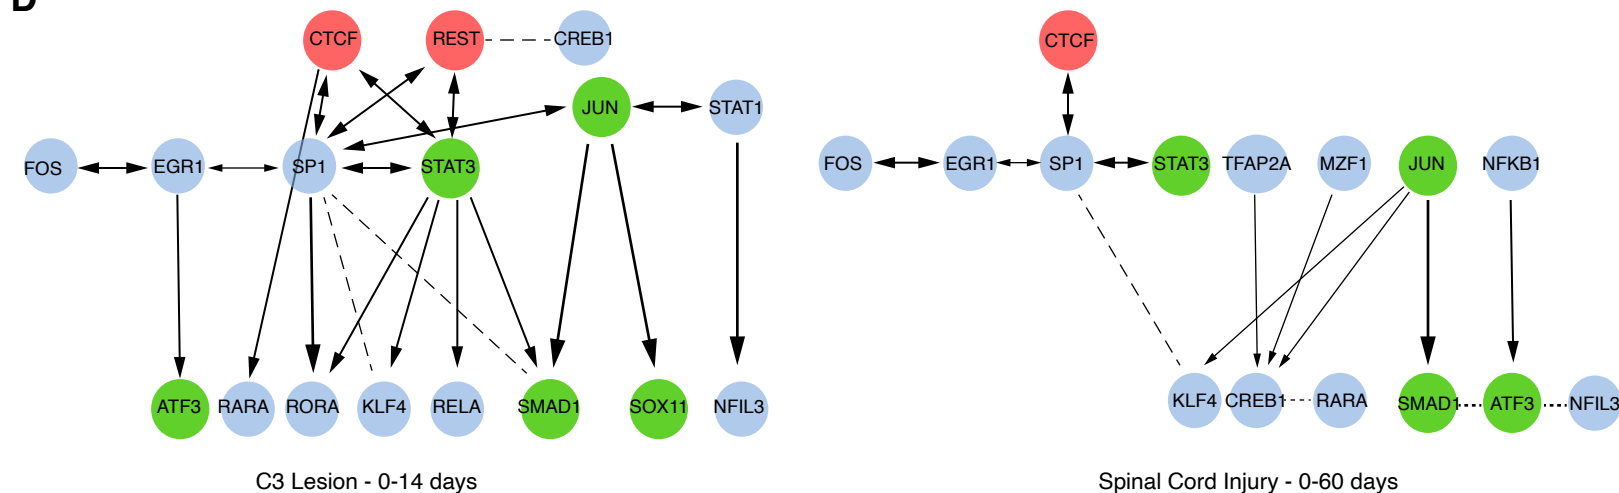

**Figure 2. Characterizing regeneration-associated transcriptional regulatory network. (A)**

Schematic diagram illustrating step-wise approaches employed to infer hierarchical TF regulatory networks from **(B)** time-course microarray datasets. Step 1: First, ARACNe was applied to each dataset to find TF-target pairs that display correlated transcriptional responses by measuring mutual information (MI) of their mRNA expression profiles (Methods). The sign (+/-) of MI scores indicates the predicted mode of action based on the Pearson's correlation between the TF and its targets. A positive MI suggests activation of this TF on its targets, while a negative MI score suggests repression. All non-significant associations were removed by permutation analysis. Second, ARACNe eliminates indirect interactions, such as two genes connected by intermediate steps, through applying a well-known property of MI called data-processing inequality (DPI). Step 2: To determine the direction of regulation between each TF interactions, ChIP-datasets from ENCODE and previously published ChIP-ChIP and ChIP-seq datasets were integrated to compile a list of all observed physical TF-target binding interactions. Step 3: To identify the hierarchical structure within directed TF networks, we used graph-theoretical algorithms to determine precise topological ordering of directed networks based on the number of connections that start from or end at each TF, indicating whether a TF is more regulating or more regulated. **(C-D)** Representative regulatory networks inferred from microarrays following peripheral nerve injury **(C)** and CNS injury **(D)**. Each node represents one of the 21 regeneration-promoting TFs if a connection exists. The thickness of each line indicates the MI between the TFs it connects. A directional arrow is drawn if there is direct physical evidence of the TF binding its target TF's promoter.

**A**

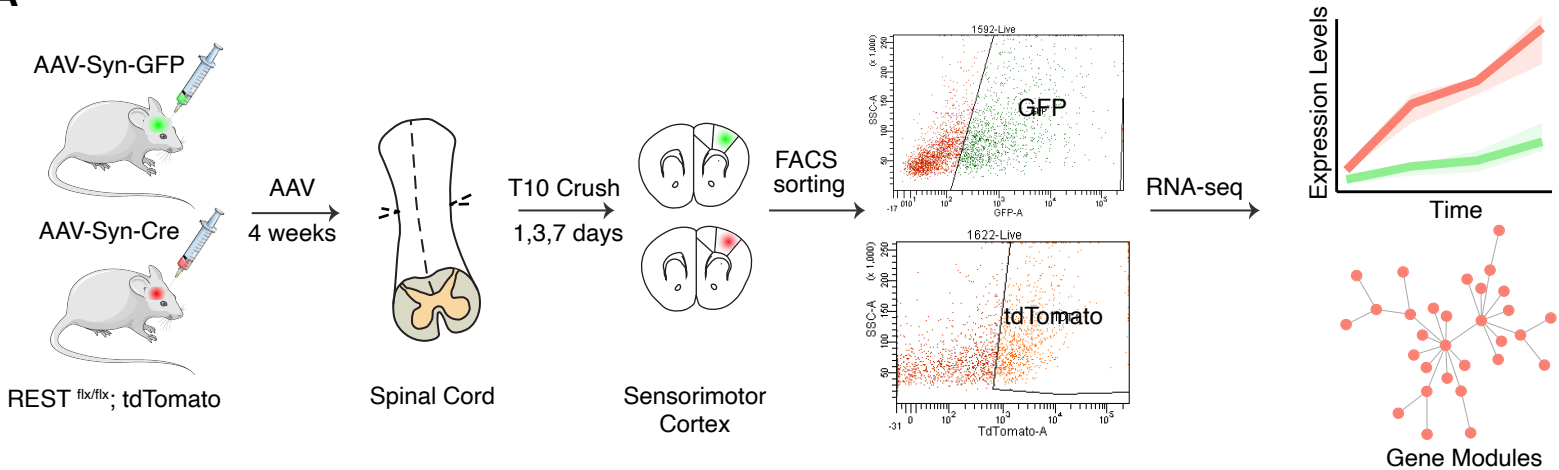

**B**

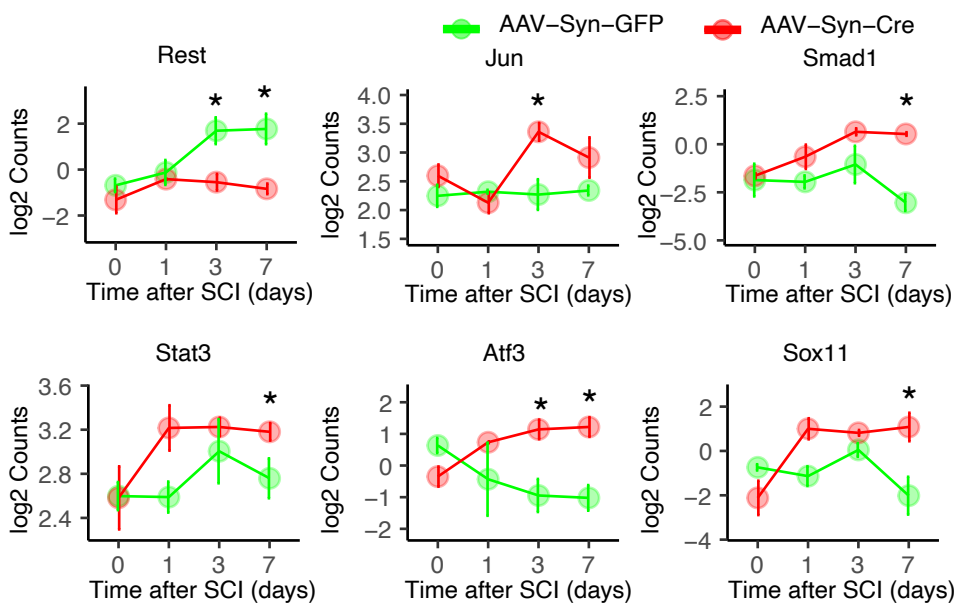

**C**

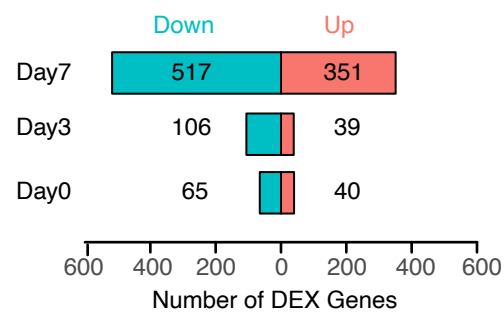

**D**

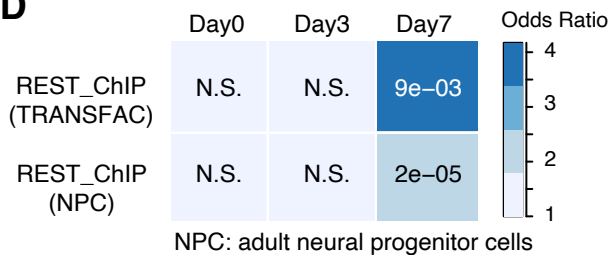

**Figure 3. REST deletion in injured cortical neurons enhances expression of regeneration-associated genes and pathways. (A)** Overview of transcriptional profiling of FACS-sorted corticospinal neurons after SCI. REST<sup>flx/flx</sup>; STOP<sup>flx/flx</sup>TdTomato mice were injected into the sensorimotor cortex with AAV expressing GFP or Cre recombinase under human synapsin promoter (AAV-Syn-GFP or AAV-Syn-CRE) in order to induce REST deletion and fluorescent labeling of CST projection neurons. Four weeks later, a complete crush injury at thoracic spinal cord level 10 (T10) was performed, followed by FACS sorting and RNA-Seq of GFP or tdTomato- expressing cortical neurons in sham-treated (day 0) and at 1, 3, and 7 days after SCI. n = 3 - 4 mice in each condition. We analyzed transcriptional differences in response to SCI and REST depletion at both individual gene expression level and co-expression network level. **(B)** Expression levels of *Jun*, *Smad1*, *Sox11*, *Stat3*, *Atf3*, and *Rest*. Values are mean log<sub>2</sub> Counts ± SEM and \*p < 0.05 compared to AAV-Syn-GFP at each time point. **(C)** Number of DEGs with FDR corrected p-value < 0.1 and |log<sub>2</sub> FC| > 0.3 at each condition. Up-regulated: red; Down-regulated: blue. **(D)** Overlap between up-regulated genes and REST target genes identified from TRANSFAC, the most extensive collection of experimentally determined TF binding sites, or REST ChIP-seq in neural progenitor cells (Mukherjee et al., 2016). Colors indicate odds ratio and values represent p-values (Fisher's exact test).

## Figure 4

**A**

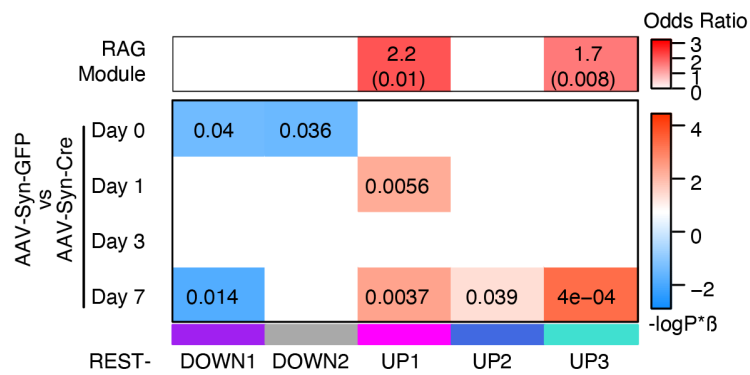

**B**

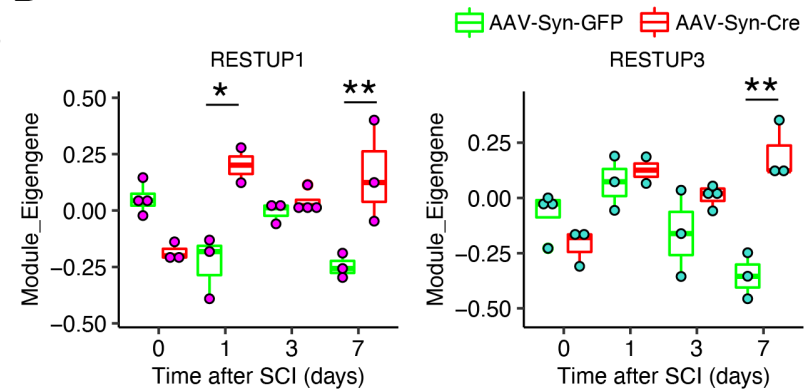

**C**

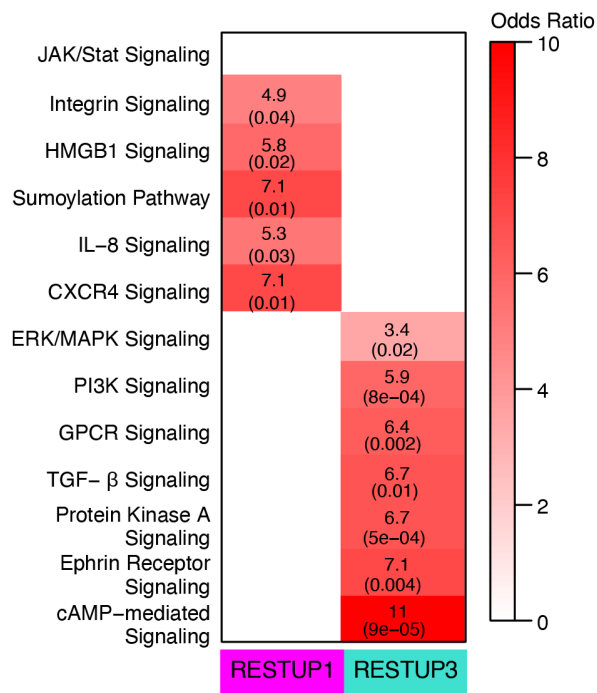

**D**

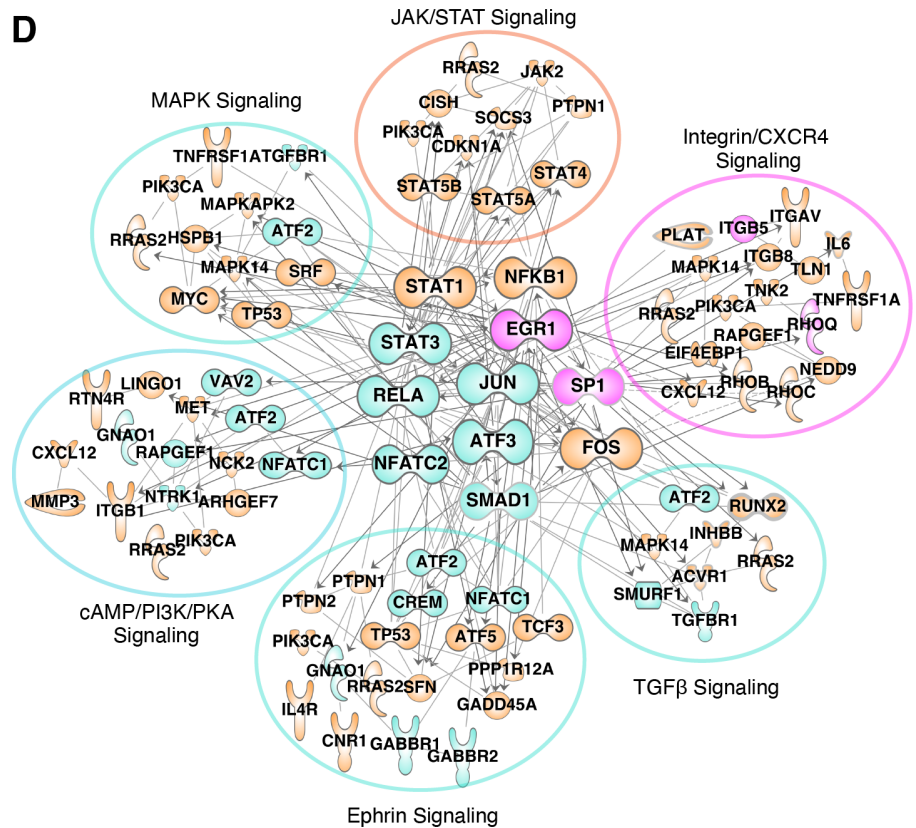

**E**

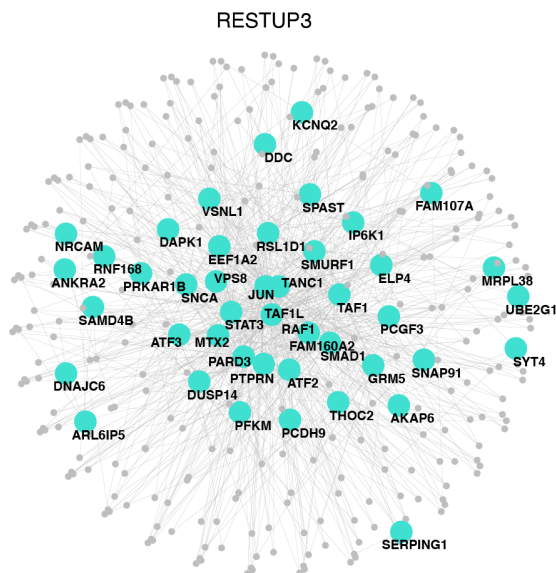

**F**

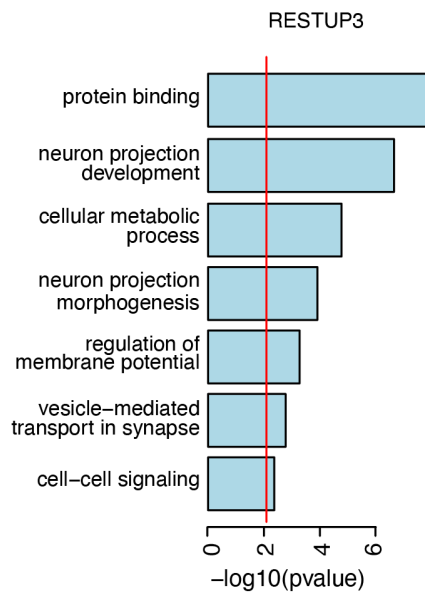

**G**

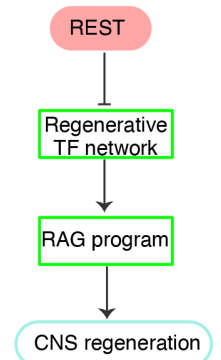



**Figure 4. Co-expression network analysis in wild-type and REST-deleted cortical neurons following SCI.** WGCNA was performed in REST<sup>flx/flx</sup> cortical neurons expressing AAV-Syn-GFP (wild-type) or AAV-Syn-CRE (REST-depleted) in the sham condition (day 0) and at 1, 3, and 7 days after SCI. **(A)** Correlation between module eigengene, the first principle component driving the expression changes of a module, with treatments (bottom panel) and over-representation (hypergeometric test) of regeneration-associated genes (RAGs) (Chandran et al., 2016) within each module (upper panel). The correlation analysis was to identify network-level changes regulated by REST based on the significant module-treatment relationships (Methods). In the correlation heatmap (bottom panel), colors indicate  $-\text{sign}(\text{correlation coefficient}) \times (\log_{10} \text{ p-value})$ . Red indicates a positive correlation and blue indicates a negative correlation. Numbers shown are Bonferroni-corrected p-values. The over-representation analysis was to determine whether modules regulated by REST are enriched with known RAGs activated by peripheral injury. In the enrichment heatmap (upper panel), numbers shown are odds ratio indicating the possibility of enrichment, with hypergeometric p-value in parenthesis. Only modules with significant correlations with REST depletion are displayed in the plot. **(B)** Trajectory of the RESTUP1 and RESTUP3 module eigengenes across different time points after SCI in AAV-Syn-GFP (green) and AAV-Syn-CRE expressing (red) neurons. These two modules are significantly associated with the RAG module activated by peripheral injury. Asterisks denote statistical significance assessed by ANOVA model with Tukey's post-hoc test: \*p < 0.05, \*\*p < 0.01 comparing AAV-Syn-CRE to AAV-Syn-GFP. **(C)** Over-representation (hypergeometric test) of regeneration-associated pathways in RESTUP1 (magenta) and RESTUP3 (turquoise). These regeneration-associated signaling pathways were derived from GO analysis of the RAG module. **(D)** Overlap between protein-protein interactions (PPI) represented by genes in the RESTUP1 and RESTUP3 modules and PPIs from the RAG module. PPIs with significant enrichment for the regeneration-associated pathways are displayed, with the core transcription factors in the center. Each node represents a molecule from the RAG module, colored by orange, while edge represents an experiment-supported PPI between two nodes. Directed edges with arrow represent physical TF-target binding interactions supported by ChIP-datasets from ENCODE and previously published ChIP-ChIP and ChIP-seq experiments. Magenta-colored nodes indicate these molecules also appear in RESTUP1 module, and turquoise indicating molecules also from RESTUP3 module. **(E)** PPI network of RESTUP3 module. The top 70 hub genes which represent the most central genes in the RESTUP3 module were labeled in the network plot. **(F)** GO terms associated with RESTUP3 module. **(G)** A hypothetical model of how REST acts on CNS axon regeneration.

**A**

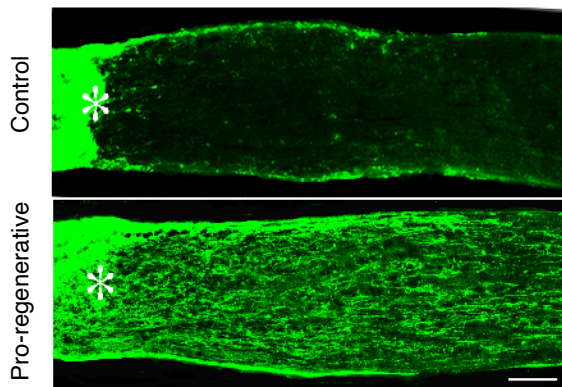

**B**

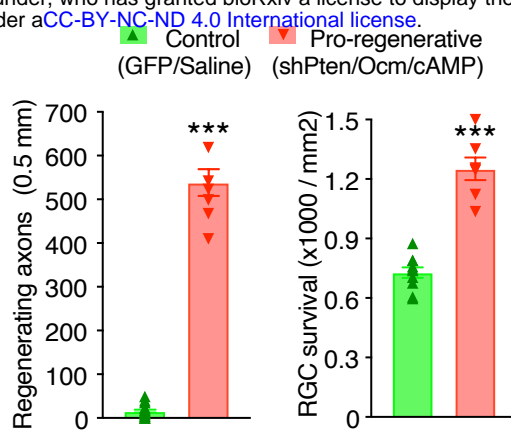

**C**

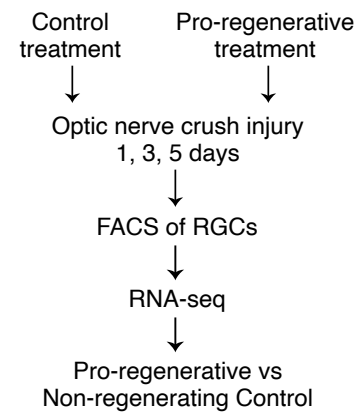

**D**

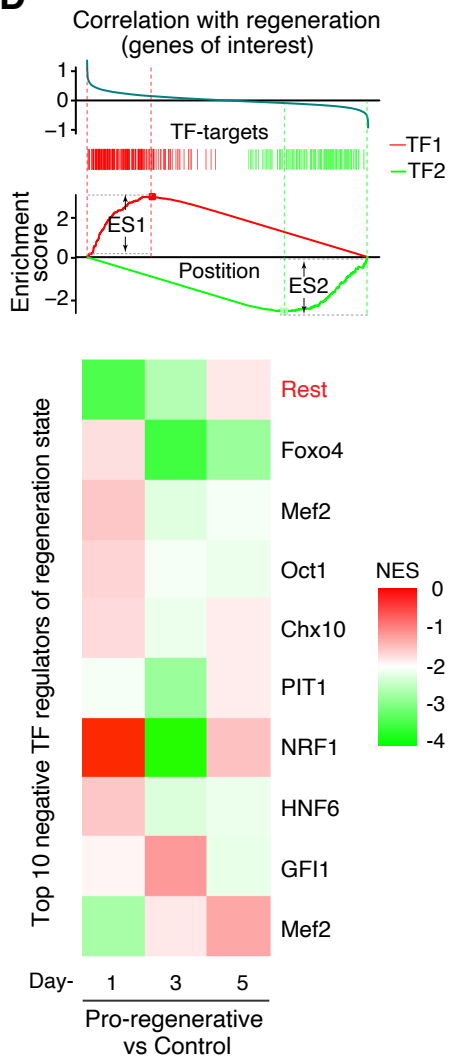

**E**

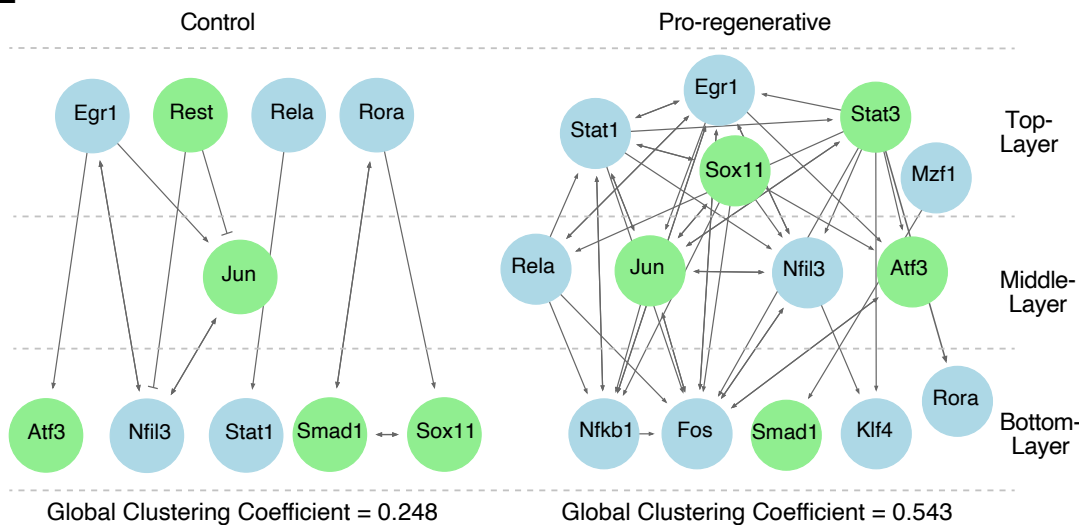

**F**

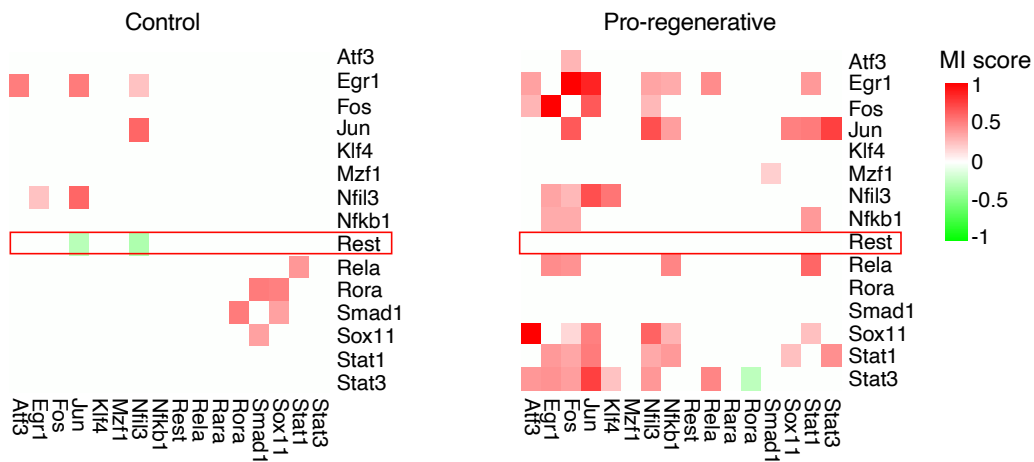

**G**

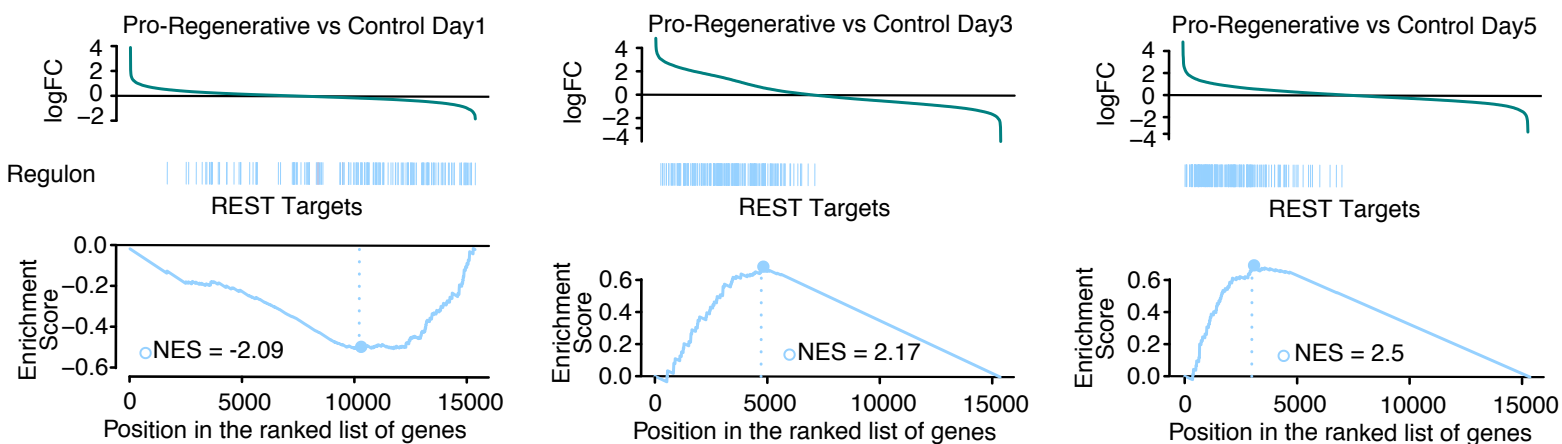

**Figure 5. REST is a transcriptional repressor negatively correlated with CNS regenerative state.**

**(A)** Longitudinal sections through the mature mouse optic nerve show regenerating axons immunostained for GAP43 (green) two weeks after optic nerve crush. Wild-type 129S1 mice expressing cyan-fluorescent protein (CFP) in RGCs received adeno-associated viruses expressing an shRNA to knock down expression of *pten* (AAV2-H1-shPten.mCherry-WPRE-bGHpA, abbreviated: AAV2-shPten.mCherry) as part of the pro-regenerative treatment, or a control virus expressing shLuciferase.mCherry (AAV2-H1-shLuc.mCherry-WPRE-bGHpA, abbr.: AAV2-shLuc.mCherry). After allowing 2 weeks for expression of transgenes, optic nerves were crushed < 0.5 mm distal to the eye and either recombinant oncomodulin plus CPT-cAMP (Ocm+cAMP, other part of pro-regenerative treatment) or saline (control) was injected intraocularly. **(B)** Quantitation of axon growth (left) and retinal ganglion cell (RGC) survival (right). *Asterisk* in A: nerve injury site. Scale bar in A: 120  $\mu$ m.

\*\*\*  $P < 0.001$ , student t-test. **(C)** Schematic depiction of experimental procedures used to generate RNA-seq data from injured RGCs with pro-regenerative treatments or non-regenerating control. B6.Cg-Tg(Thy1-CFP)23Jrs/J mice expressing cyan fluorescent protein in RGCs received the same pro-regenerative or control treatments as in **(A-B)**. Retinas were dissected and dissociated at 1, 3, or 5 days after surgery, and CFP<sup>+</sup>mCherry<sup>+</sup> RGCs were separated by FACS. Transcriptomes were evaluated by RNA-Seq to identify transcriptional changes associated with axon regeneration. **(D)** Gene set enrichment analysis (GSEA) to screen TFs correlating with RGC regenerative state. Upper panel: schema demonstrating the principle of GSEA. In this analysis, genes of interest are ranked by their correlations of expression changes with treatments measured by directional p-value, which is calculated as  $-\text{sign}(\log \text{Treatment/Control}) * (\log_{10} \text{p-value})$ . A positive correlation indicates up-regulation of a gene by pro-regenerative treatment, while a negative correlation indicates down-regulation. Given an *a priori* gene set known to be targeted by a TF, the goal of GSEA is to determine whether this TF's targets are randomly distributed throughout genes of interest, or primarily found at the top or bottom. An enrichment at the bottom suggests that the TF down-regulates genes of interest, and is thus a negative regulator of the regenerative state (ES < 0; TF2 as an example), while an enrichment at the top suggests this TF is a positive regulator of regeneration (ES > 0; TF1 as an example). Bottom panel: A total of 1137 TF targeted gene sets were screened and the top 10 negative TF regulators of RGCs' regeneration state were shown in the heatmap by their normalized enrichment scores (NES). **(E)** Transcriptional regulatory networks comparing RGCs in non-regenerating (control) and regenerating state (pro-regenerative). The networks were constructed using the unbiased, step-wise pipeline described in Figure 2A. **(F)** MI scores of each TF-pair in the networks **(E)** indicating the degree of their correlation. **(G)** Distribution of REST-repressed target genes defined by ARACNe throughout the de-regulated genes by pro-regenerative treatments ranked by log<sub>2</sub>-fold changes (logFC, pro-regenerative vs non-regenerating) at indicated times following optic nerve crush.

## Figure 6

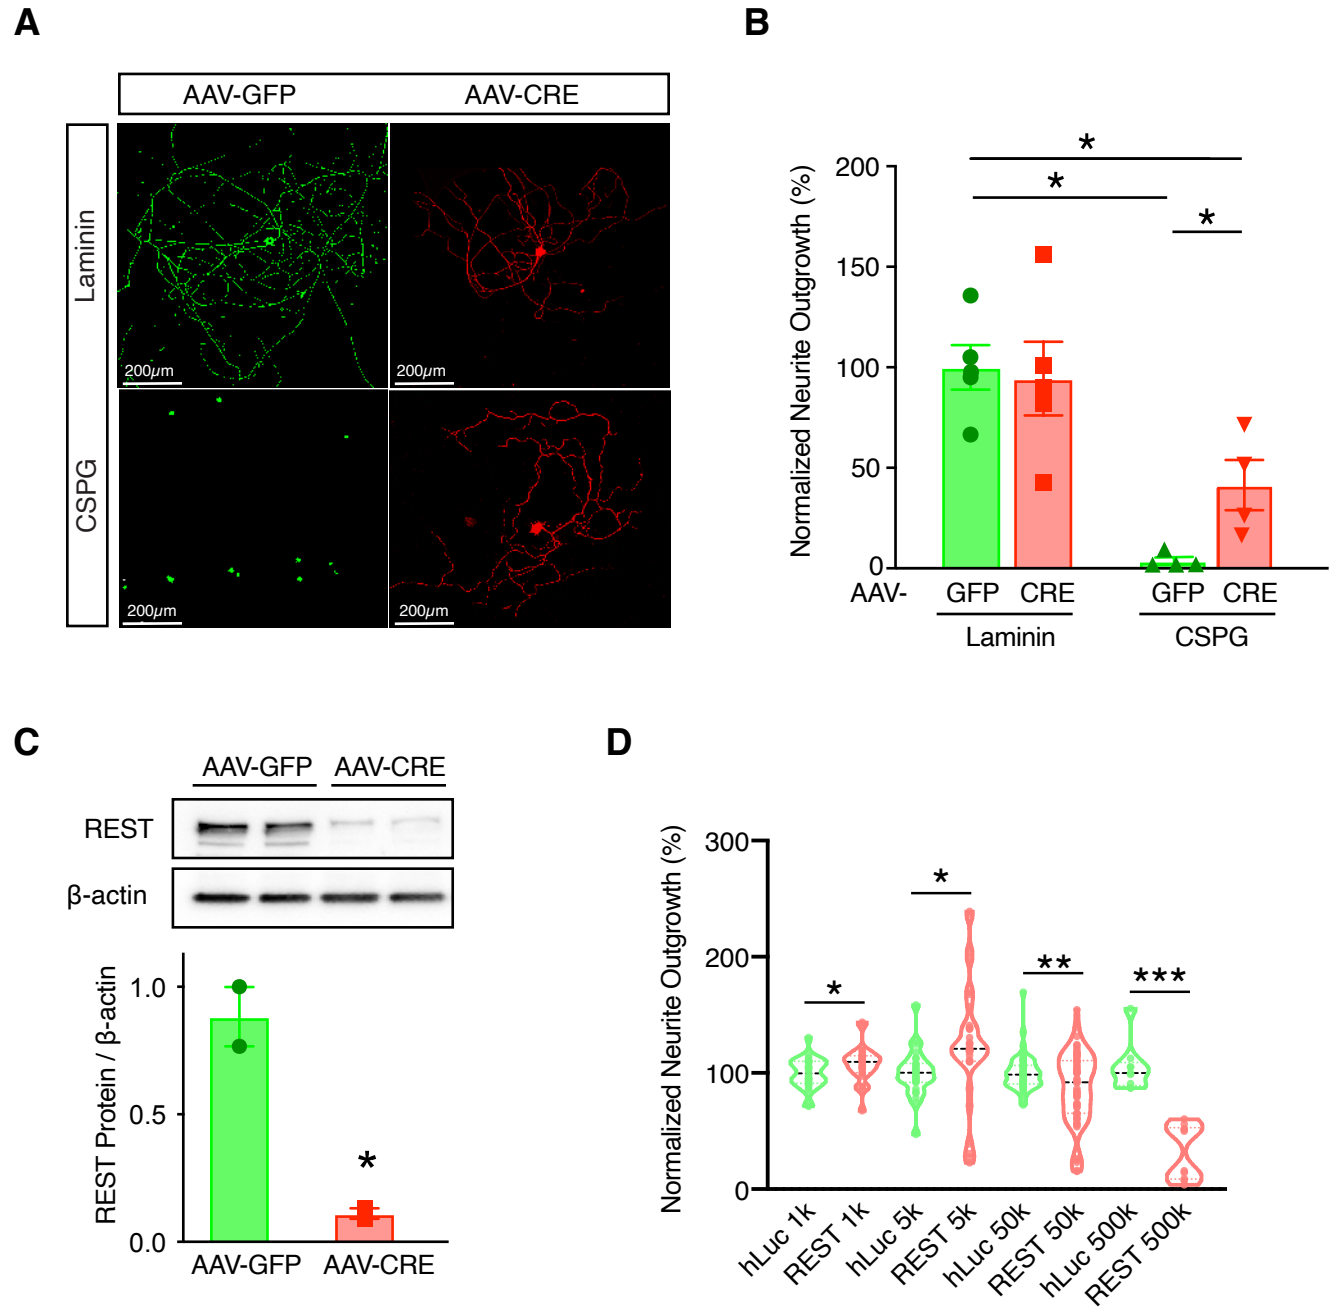

**Figure 6. REST inhibits neurite growth *in vitro*.** **(A)** Tuj1 ( $\beta$ III tubulin) staining of REST<sup>flx/flx</sup>;tdTomato DRG neurons cultured on CSPG (5  $\mu$ g/ml) or laminin only (2  $\mu$ g/ml) and transduced with AAV-GFP (green) or AAV-CRE (red) at  $\sim$  100,000 genome copies per cell for 7 days to allow the expression of transgenes. **(B)** Mean neurite outgrowth normalized to AAV-GFP infected neurons cultured on laminin. Bars represent mean  $\pm$  SEM; Asterisks denote statistical significance assessed by two-way ANOVA with Bonferroni post-hoc test (\*p < 0.05). **(C)** Representative western blot and quantitation of REST levels in DRG cells transduced with AAV-GFP or AAV-CRE. **(D)** Volcano plot showing the mean neurite outgrowth of re-plated DRG neurons infected with lentiviral constructs expressing either REST (Lv135-REST) or humanized luciferase protein (Lv135-hLuc) as a control driven by the CMV promoter at indicated genome copies per cell for 7 days. Neurite extension was quantified 24 hr following re-plating. Each dot represents the mean neurite outgrowth from 6 wells from a replicate experiment normalized to control at indicated viral doses. Asterisks denote statistical significance assessed by Student's t-test (\* p-value < 0.05; \*\* p-value < 0.01)



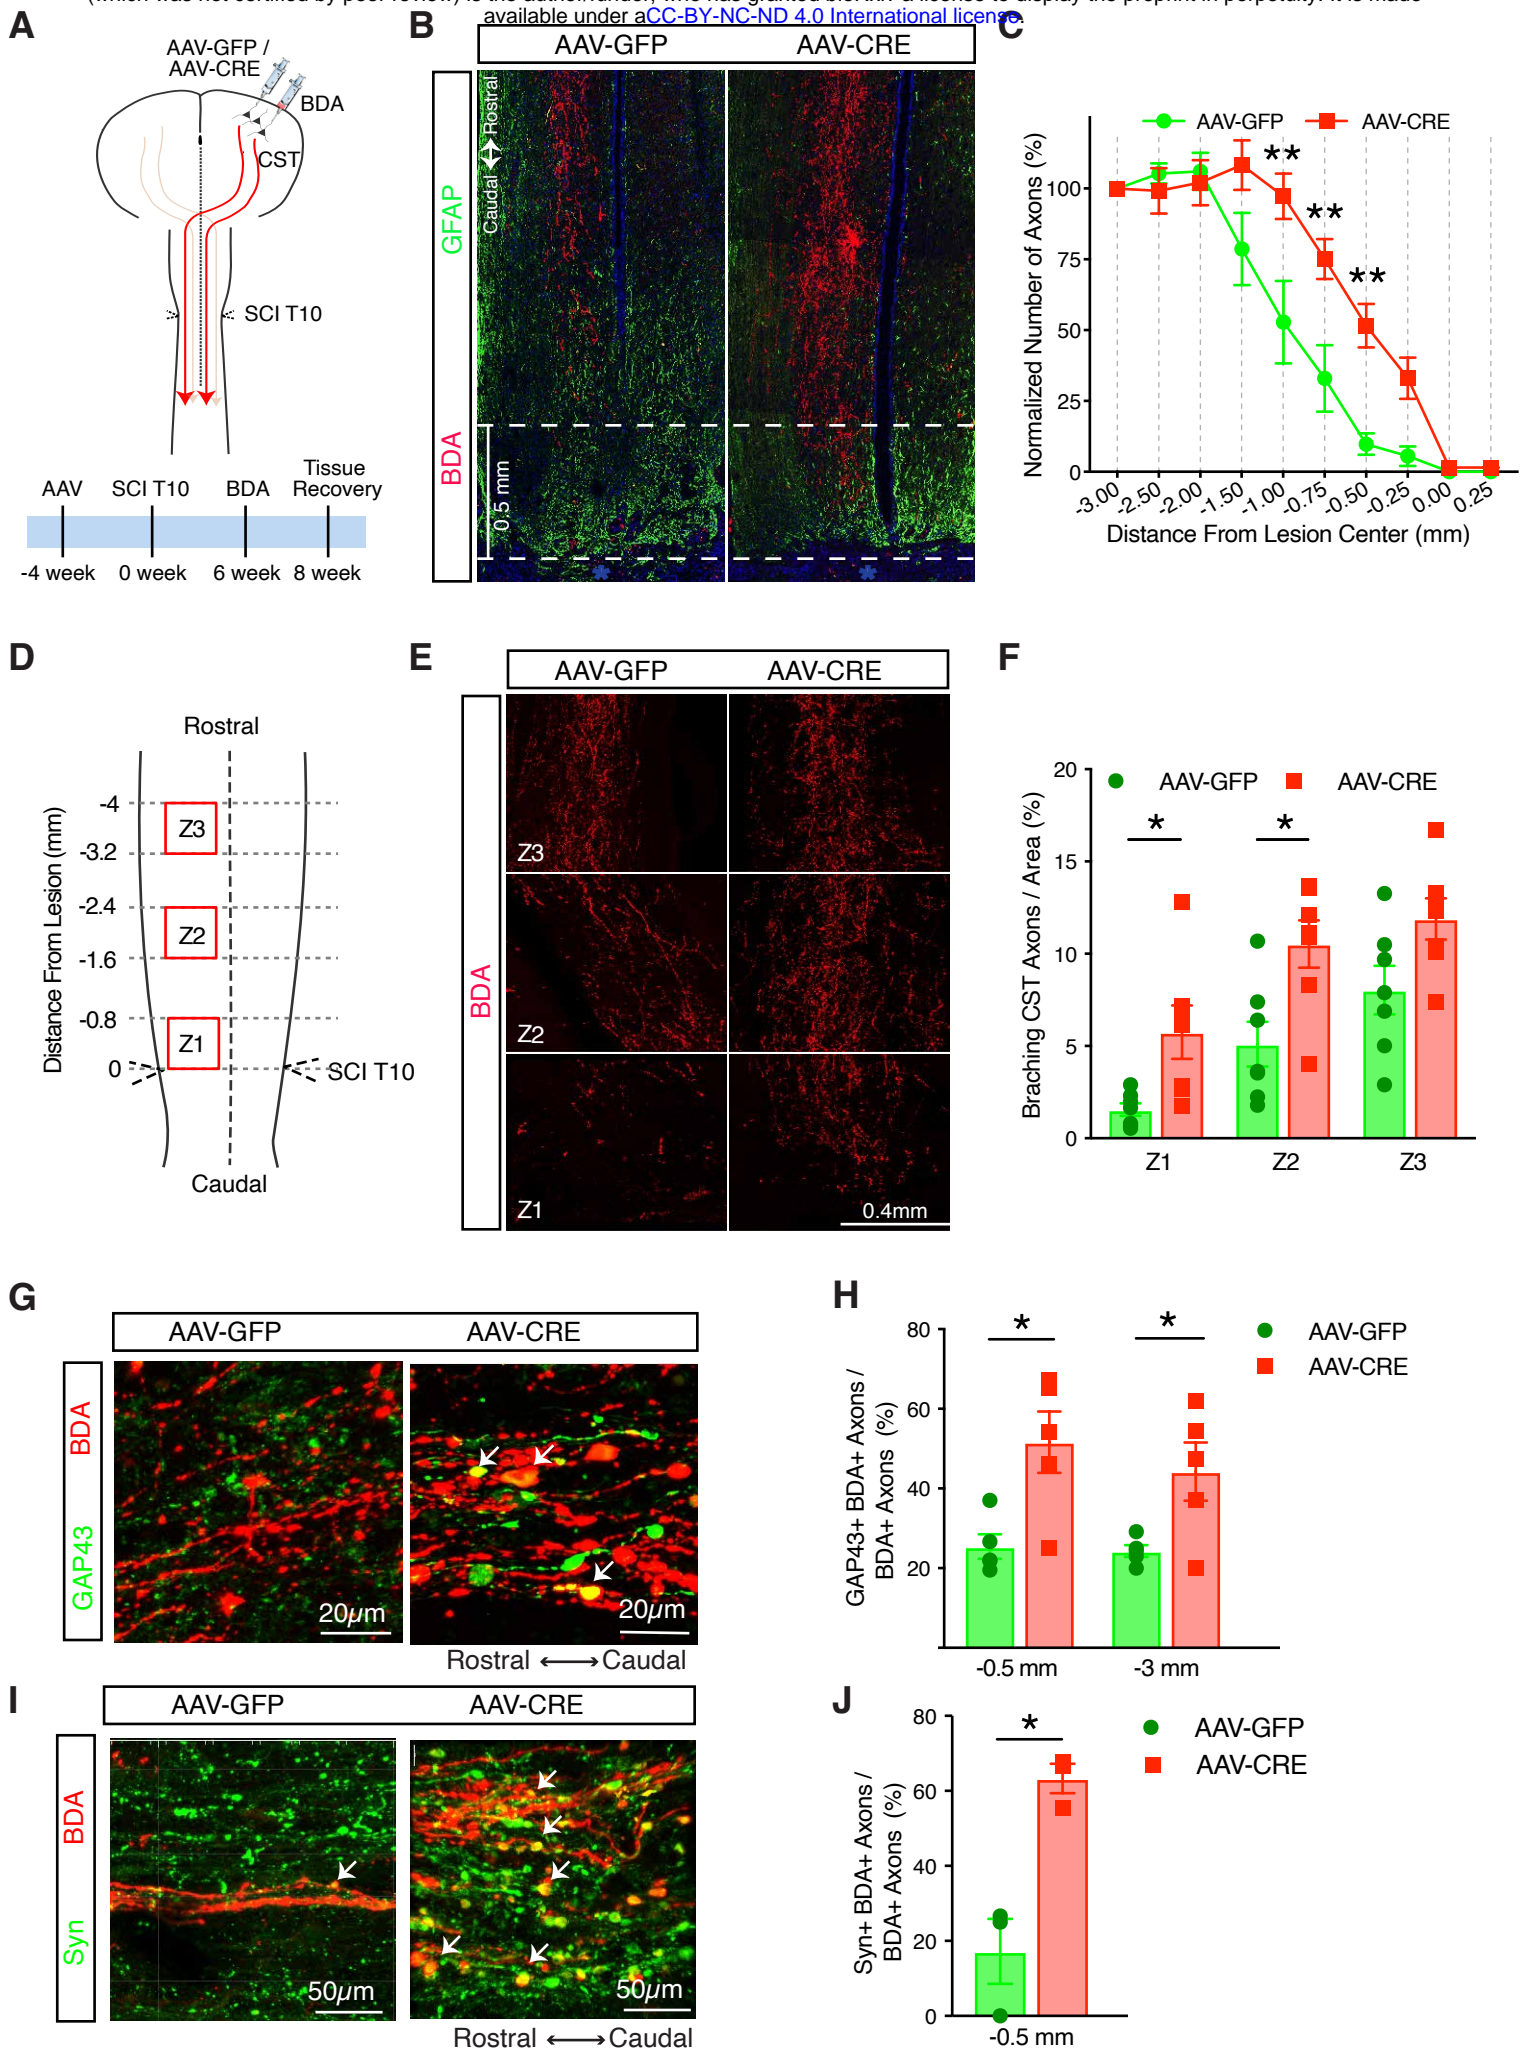



**Figure 7. REST deletion enhances corticospinal (CST) axon regeneration after anatomically complete spinal cord crush injury. (A)** Schematic diagram and timeline of inducing REST deletion and SCI lesions. REST<sup>flx/flx</sup> mice were injected into the sensorimotor cortex with AAV2/8.CAG.eGFP.WPRE.polyA (AAV-GFP) or AAV2/8.CAG.Cre-HA.WPRE.polyA (AAV-CRE). Four weeks later, a full crush at thoracic spinal cord level 10 (T10) was performed, followed by cortical injection of BDA to label CST axons. Spinal cords were recovered two weeks after BDA injection. **(B)** Confocal images of BDA-labeled CST axons of lesioned spinal cord also stained for astrocytes (glial fibrillary acidic protein, GFAP). Dashed line represents lesion center (marked with \*). **(C)** Intercepts of CST axons with lines drawn at various distances rostral to the lesion center were counted and expressed as percent of the number of intact axons at 3 mm proximally to control for potential variability in the fluorescence intensity among animal. N = 10-12 mice (male and female mixed) in each group; Each dot represents mean  $\pm$  SEM; \*\*p < 0.01 compared to AAV-GFP at each distance (two-way ANOVA with repeated measures, Bonferroni corrected for multiple comparisons). **(D)** Schematic diagram showing regions along the central canal in horizontal sections of lesioned spinal cord used for quantifying branching of CST axons. Three 0.8 x 0.8 mm<sup>2</sup> squares (Z1, Z2, Z3) were drawn in the grey matter of each spinal cord as illustrated and the number of axons were counted per square. **(E)** Confocal images of CST axons labeled by BDA in Z1, Z2, and Z3 of each spinal cord. **(F)** Quantitation of the number of axons per area. Bars represent mean  $\pm$  SEM; Asterisks denote statistical significance assessed by two-way ANOVA with Bonferroni post-hoc test (\*p < 0.05 compared to AAV-GFP at each area). **(G-J)** The number of GAP43- or Synaptophysin- expressing axons co-labeled with BDA were counted at 0.5 mm or 3 mm rostral to the SCI crush, and are expressed as percent of BDA labeled axons at respective distances. Confocal images of CST axons (BDA) co-labeled with **(G)** GAP43 or **(I)** Synaptophysin (Syn) at 0.5 mm rostral to the lesion center. **(H)** Quantitation of CST axons expressing GAP43 at 0.5 and 3 mm rostral to lesion center. **(J)** Quantitation of CST axon terminals expressing Syn at 0.5 mm rostral to lesion center. Bars represent mean  $\pm$  SEM; Asterisks denote statistical significance assessed by one-way ANOVA with Bonferroni post-hoc test **(H)** or Student t-test **(J)** (\*p < 0.05 compared to AAV-GFP in each area).

**A**

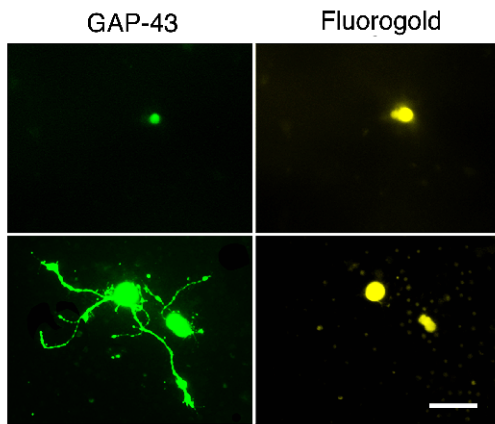

**B**

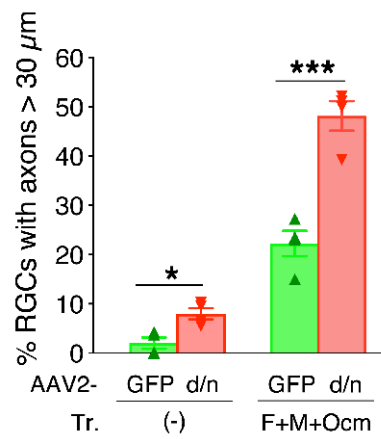

**C**

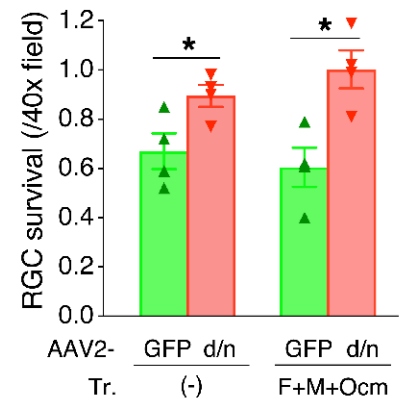

**D**

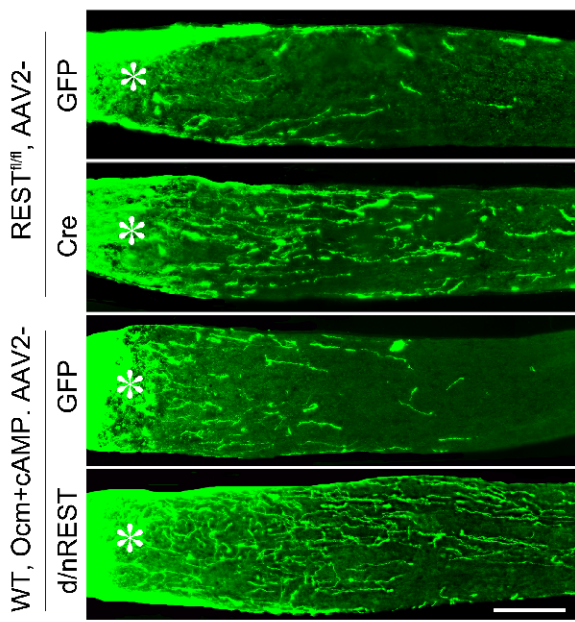

**E**

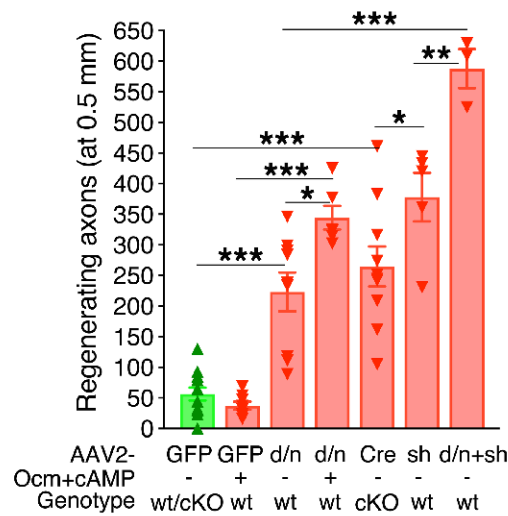

**F**

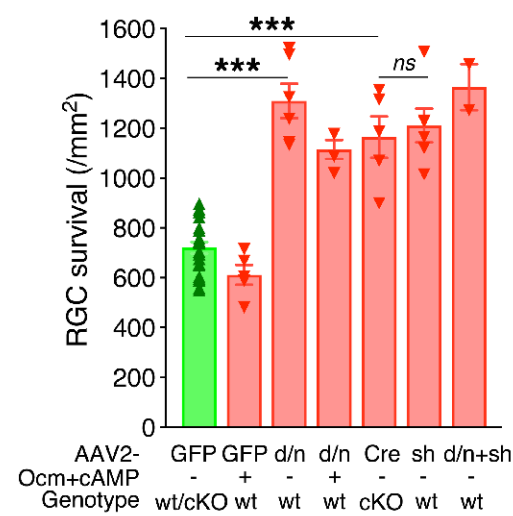

**G**

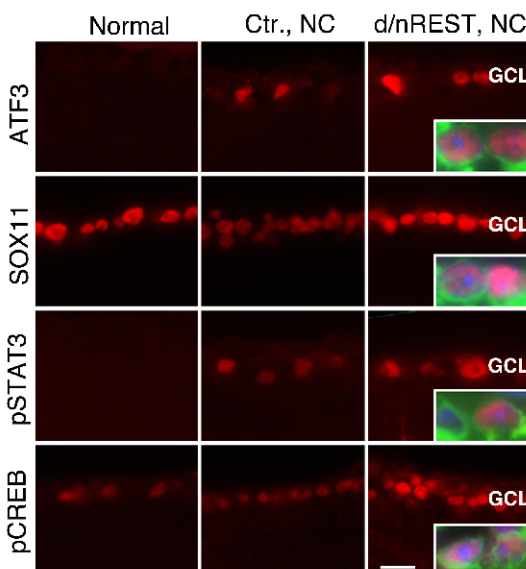

**H**

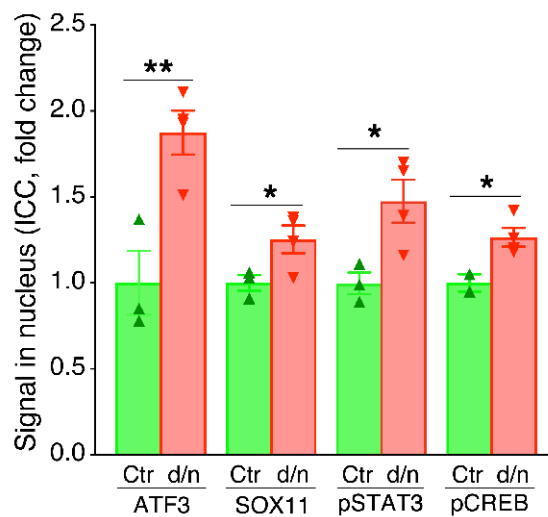

**I**

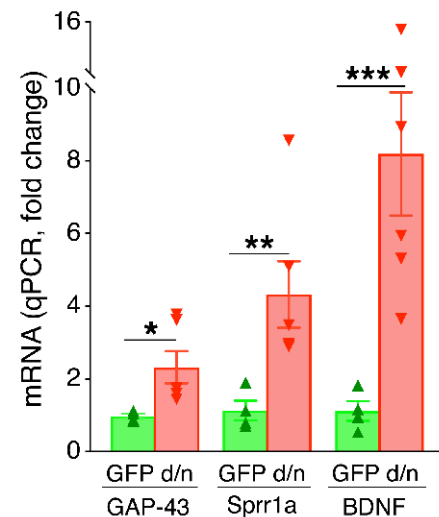

**Figure 8. REST inactivation stimulates axon outgrowth from RGCs, optic nerve regeneration, and RGC neuroprotection. (A-C)** Effect of REST inactivation on adult rat RGCs in culture. Animals received intraocular injections of either AAV2-d/nREST (d/nREST) or AAV2-GFP (GFP) one week prior to dissecting retinas and preparing dissociated cultures. Cells were maintained in the presence or absence of forskolin (to elevate cAMP), mannose, and recombinant oncomodulin (F+M+Ocm) for 3 days. **(A)** GAP-43 immunostaining of RGCs (identified via retrograde labeling with Fluorogold injected into the superior colliculus 7 da earlier). **(B)** Axon outgrowth represented as percentage of RGCs with axons  $\geq 30 \mu\text{m}$ . **(C)** RGC survival in culture. **(D-F)** Effects of REST deletion or antagonism on optic nerve regeneration and RGC survival *in vivo*. REST deletion was obtained by injecting REST<sup>flx/flx</sup> mice (cKO) intraocularly with AAV2-CAG-Cre.WPREpA (Cre); control REST<sup>flx/flx</sup> mice received AAV2-CAG-eGFP.WPREpA (GFP). As a second approach, wildtype 129S1 mice (WT) received AAV2-CAG-d/n human REST-HA-SV40pA (d/n) to interfere with REST function or with AAV2-GFP (GFP). In addition to inactivating REST, some WT mice received recombinant Ocm plus CPT-cAMP (Ocm+cAMP). Control mice (green bar in E, F) were pooled from REST<sup>flx/flx</sup> mice and WT receiving AAV-GFP since there is no difference baseline regeneration between these two groups (Mean $\pm$ SEM: (71.07 $\pm$ 14.65) vs (41.57 $\pm$ 13.65),  $P = 0.09$ . Also see Results) **(D)** Longitudinal sections (14  $\mu\text{m}$ ) show CTB-labeled axons regenerating through the optic nerve. *Asterisk*: nerve injury site. **(E)** Quantitation of axon regeneration (CTB-positive axons 500  $\mu\text{m}$  distal to the injury site) and **(F)** RGC survival ( $\beta$ III-tubulin positive cells/mm<sup>2</sup>, average for 8 fields/retina). Both conditional deletion of REST and expression of d/n REST in RGCs increased optic nerve regeneration **(D, E)** and RGC survival **(F)**. **(G-I)** Target gene changes after REST down-regulation. One day after nerve crush, transcription factors predicted to be downstream targets of REST (ATF3, SOX11, pSTAT3), along with pCREB, were elevated in RGC nuclei in mice injected with AAV2-d/nREST (d/nREST, NC) prior to nerve injury (compared to mice receiving the control virus (Ctl. NC) **(G, H)**. Inserts show RGCs at higher magnification: TUJ1: RGCs, *green*; DAPI: nuclei, *blue*; target genes: *red*. Seven days after the nerve crush, mRNAs encoding growth-related proteins were elevated in FACS-selected RGCs expressing d/n REST **(I)**. Statistical tests: **B,C**: student t-test; **E,F**: one-way ANOVA with Bonferroni post-hoc test; **H,I**: multiple t-test. \* $P < 0.05$ ; \*\* $P < 0.01$ , \*\*\* $P < 0.001$ . Scale bar in A: 20  $\mu\text{m}$ , in D: 200  $\mu\text{m}$ , in G: 15  $\mu\text{m}$ .
